# Supplementary material for: Bismuth(iii) triflate as a novel and efficient activator for glycosyl halides
Source: Royal Society of Chemistry journal article supplement (doi:10.1039/d1ob00093d), 2021-01-01
Supplement: d1ob00093d1.pdf [file d1ob00093d1.pdf]

## **Supporting Information**

### **Bismuth(III) triflate as a novel and efficient activator for glycosyl halides**

Hayley B. Steber, Yashapal Singh,\* and Alexei V. Demchenko\*

*Department of Chemistry and Biochemistry, University of Missouri – St. Louis, One University Boulevard, St. Louis, MO 63121, USA; e-mail: [demchenkoa@umsl.edu](mailto:demchenkoa@umsl.edu), [satpal04@gmail.com](mailto:satpal04@gmail.com)*

## **Contents**

|                                                            |     |
|------------------------------------------------------------|-----|
| NMR Spectra for New Compounds .....                        | S2  |
| <sup>1</sup> H NMR Spectra of Known Oligosaccharides ..... | S25 |

## NMR Spectra for New Compounds

### Ethyl 2,6-di-*O*-benzoyl-4-*O*-benzyl-3-*O*-*tert*-butyldimethylsilyl-1-thio- $\beta$ -D-galactopyranoside (33)

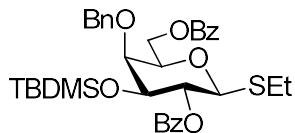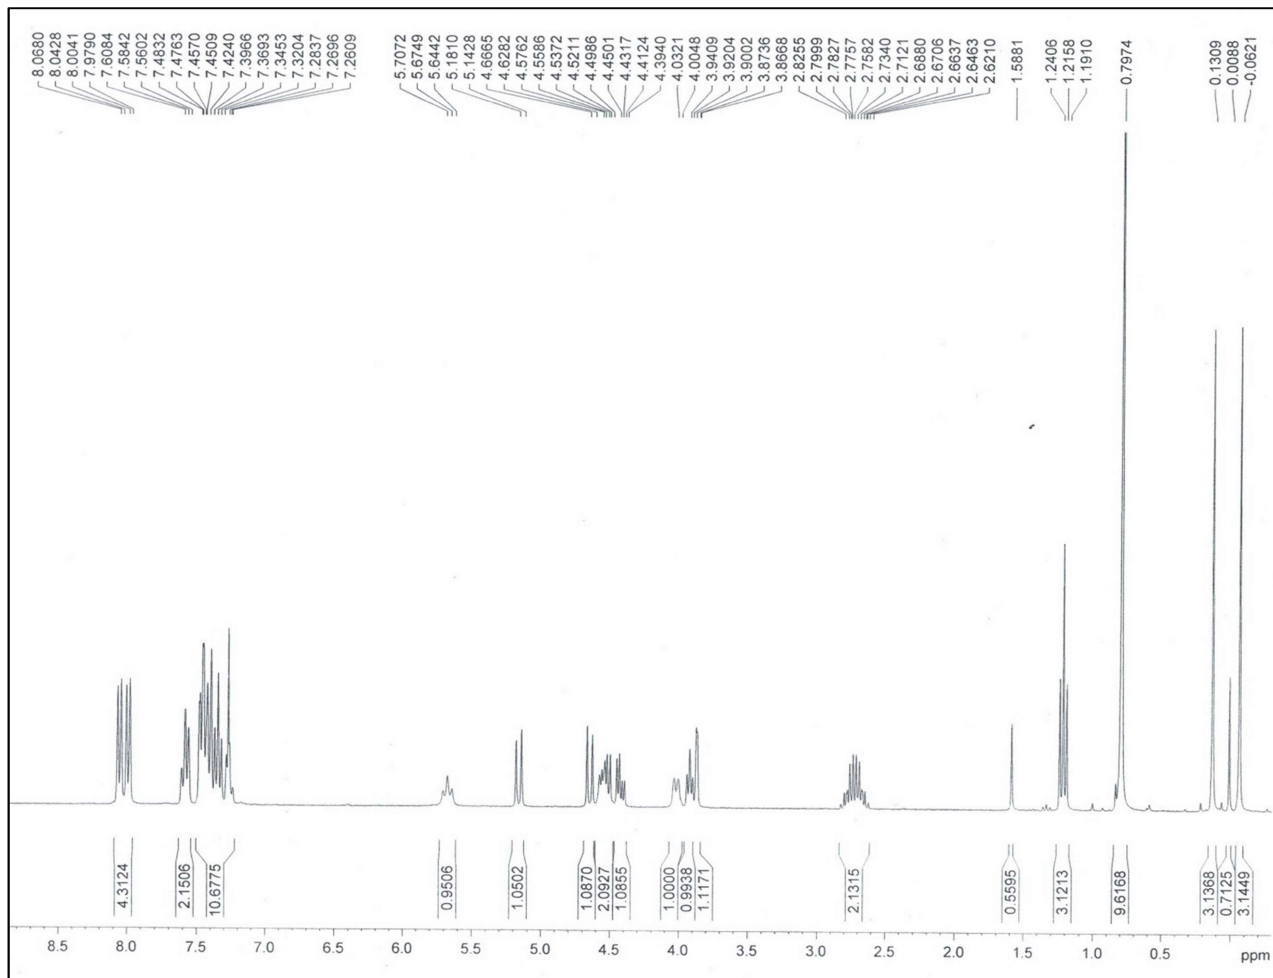

<sup>1</sup>H NMR spectrum (CDCl<sub>3</sub>, 300 MHz)

**Ethyl 2,6-di-*O*-benzoyl-4-*O*-benzyl-3-*O*-*tert*-butyldimethylsilyl-1-thio- $\beta$ -D-galactopyranoside (33)**

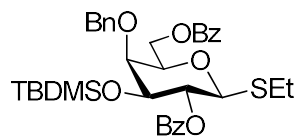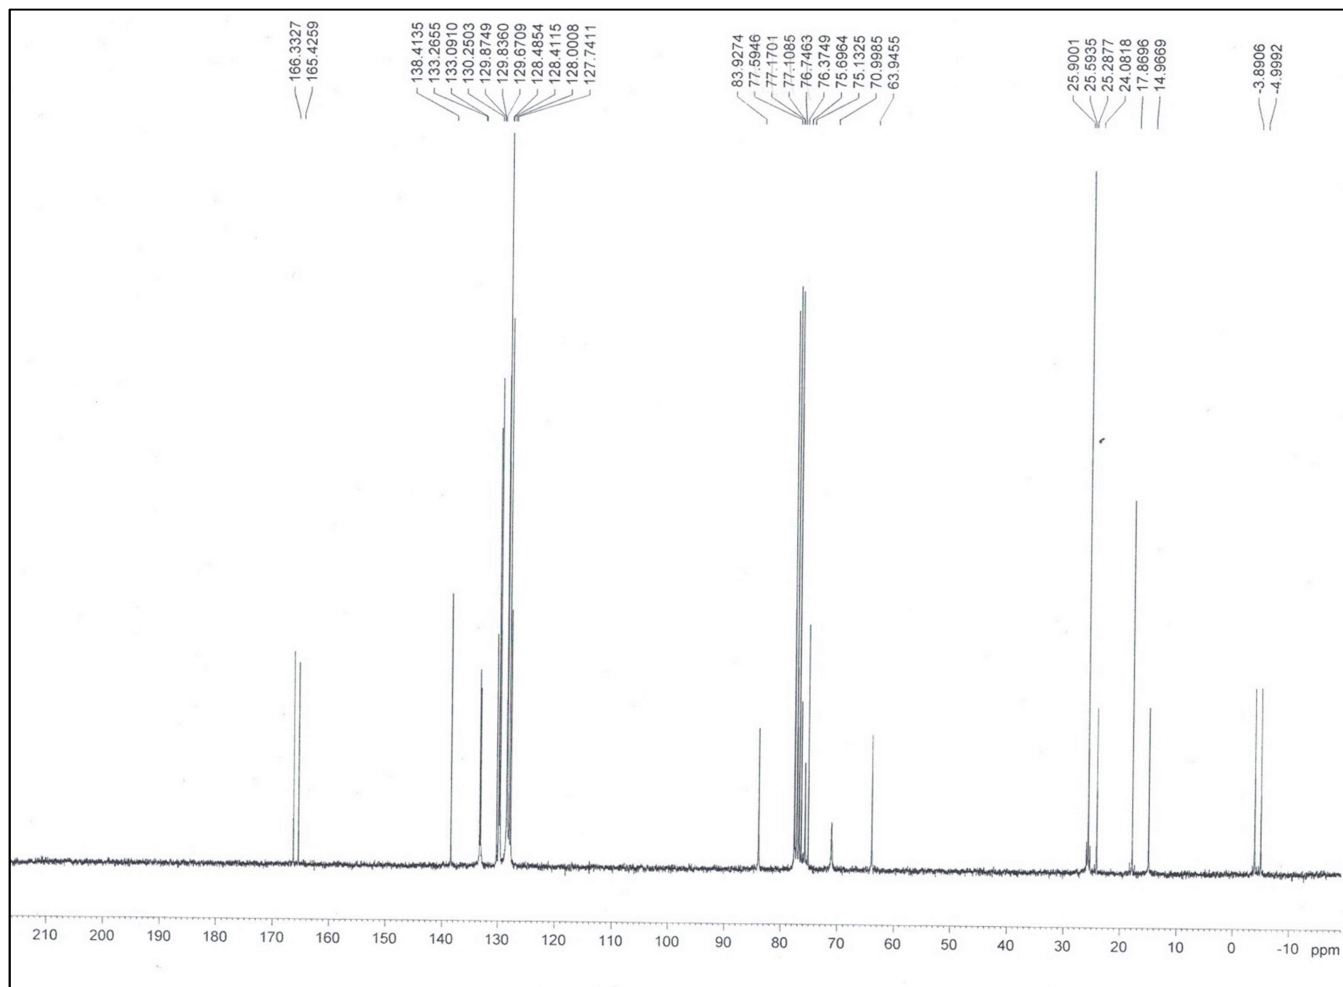

$^{13}\text{C}$  NMR spectrum (75 MHz,  $\text{CDCl}_3$ )

**Ethyl 2,6-di-*O*-benzoyl-4-*O*-benzyl-3-*O*-*tert*-butyldimethylsilyl-1-thio- $\beta$ -D-galactopyranoside (33)**

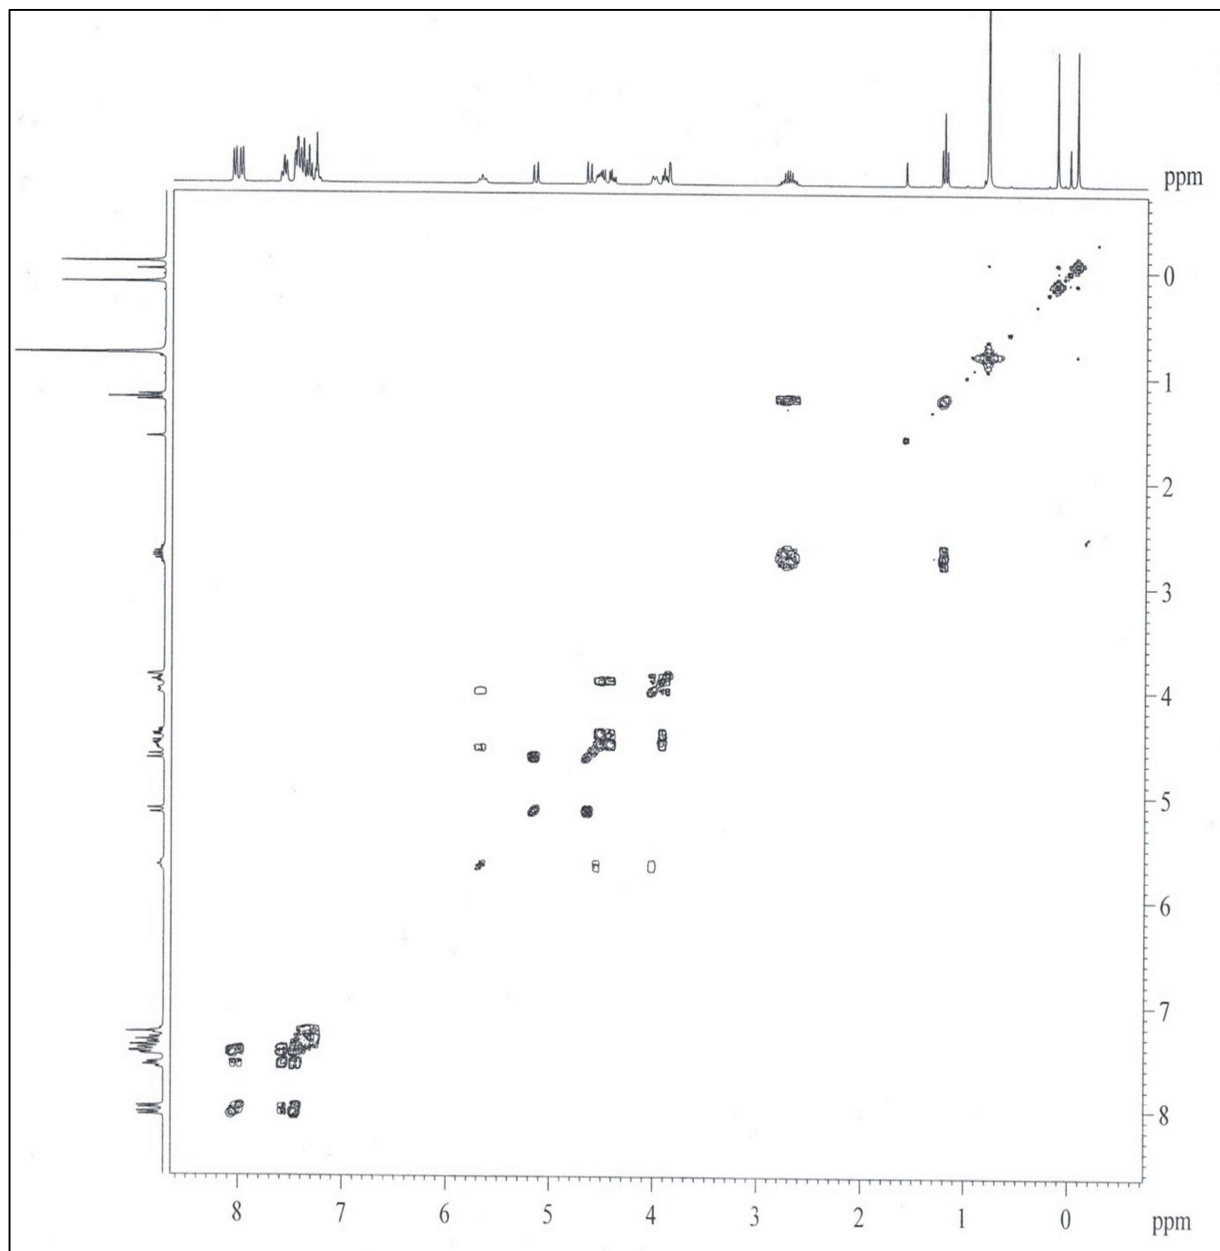

2D NMR (300 MHz,  $\text{CDCl}_3$ )

**Ethyl 4, 6-di-*O*-benzyl-2-deoxy-3-*O*-levulinoyl-2-phthalimido-1-thio- $\beta$ -D-glucopyranoside (34)**

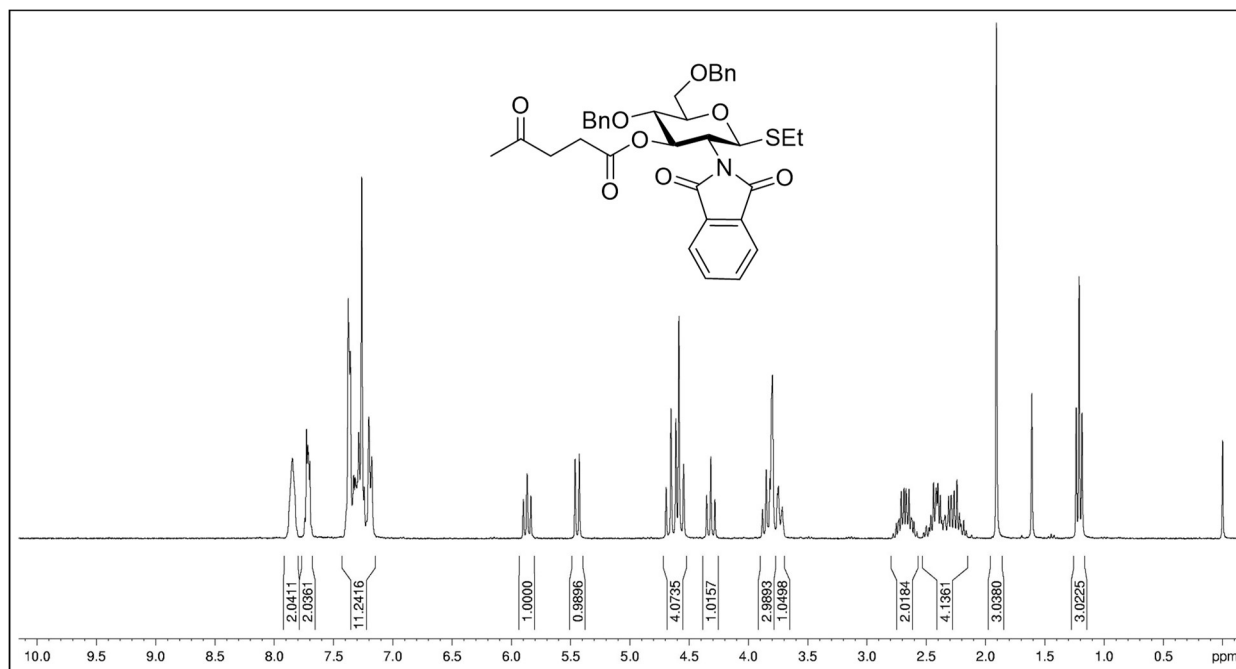

<sup>1</sup>H NMR spectrum (CDCl<sub>3</sub>, 300 MHz)

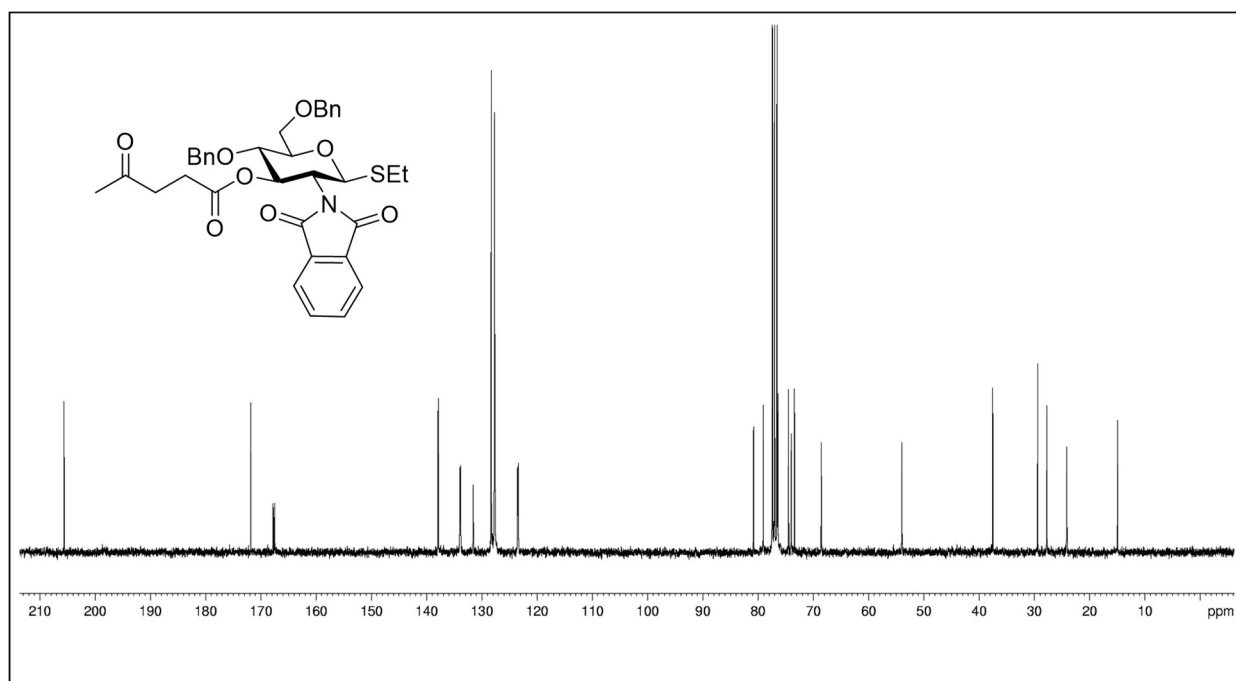

<sup>13</sup>C NMR spectrum (75 MHz, CDCl<sub>3</sub>)

Ethyl 4, 6-di-*O*-benzyl-2-deoxy-3-*O*-levulinoyl-2-phthalimido-1-thio- $\beta$ -D-glucopyranoside (34)

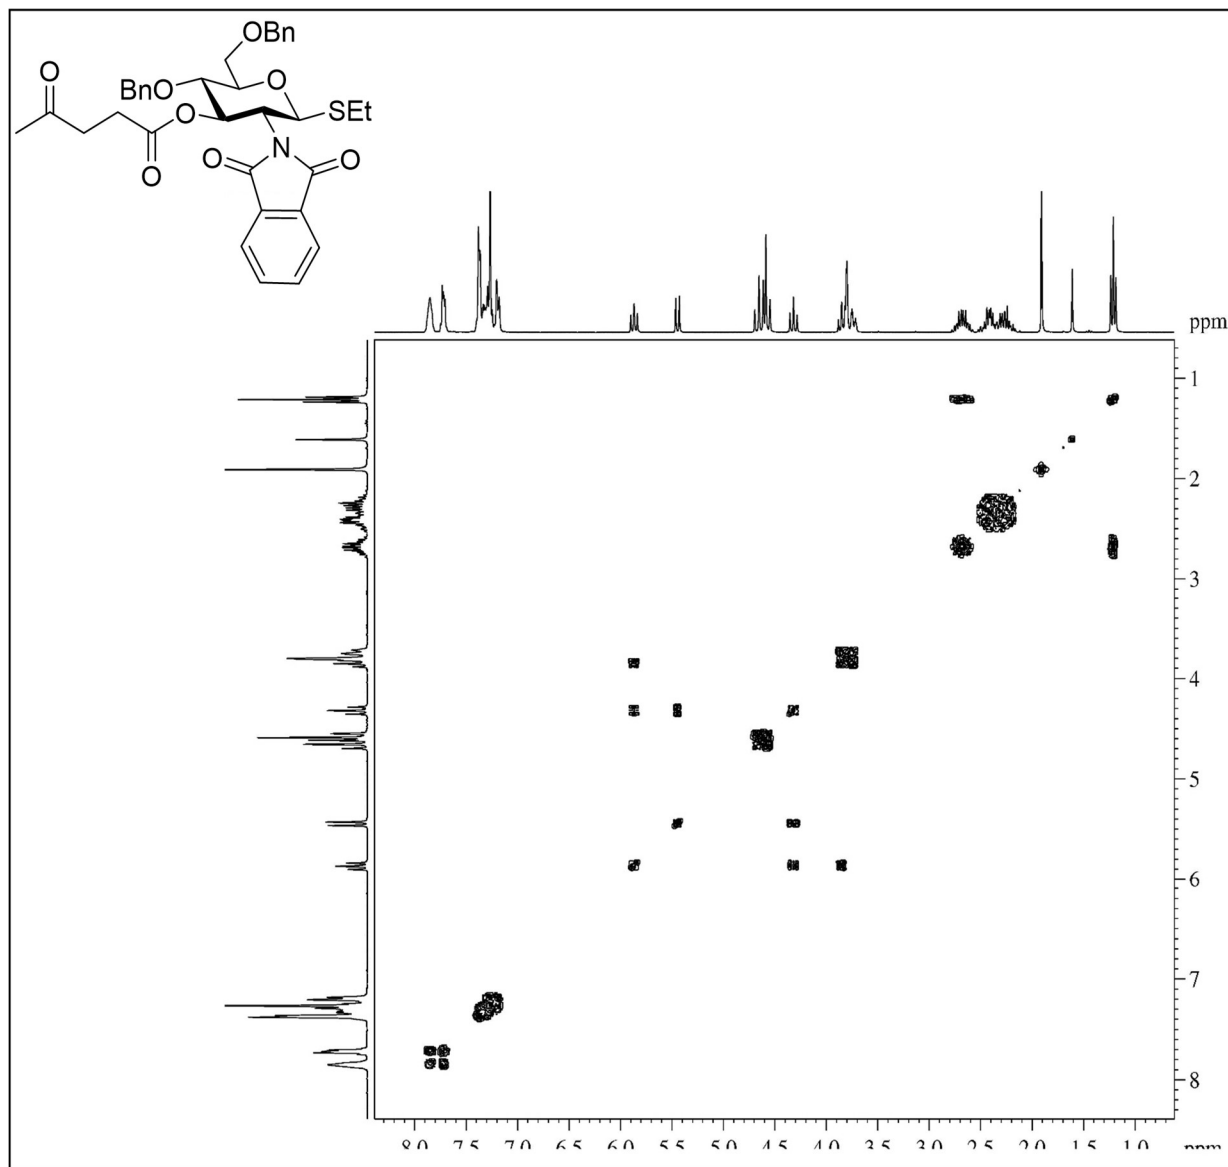

2D NMR (300 MHz, CDCl<sub>3</sub>)

**Ethyl 6-O-benzoyl-4-O-benzyl-2-deoxy-2-phthalimido-3-O-tert-butyldimethylsilyl-1-thio-β-D-glucopyranoside (49)**

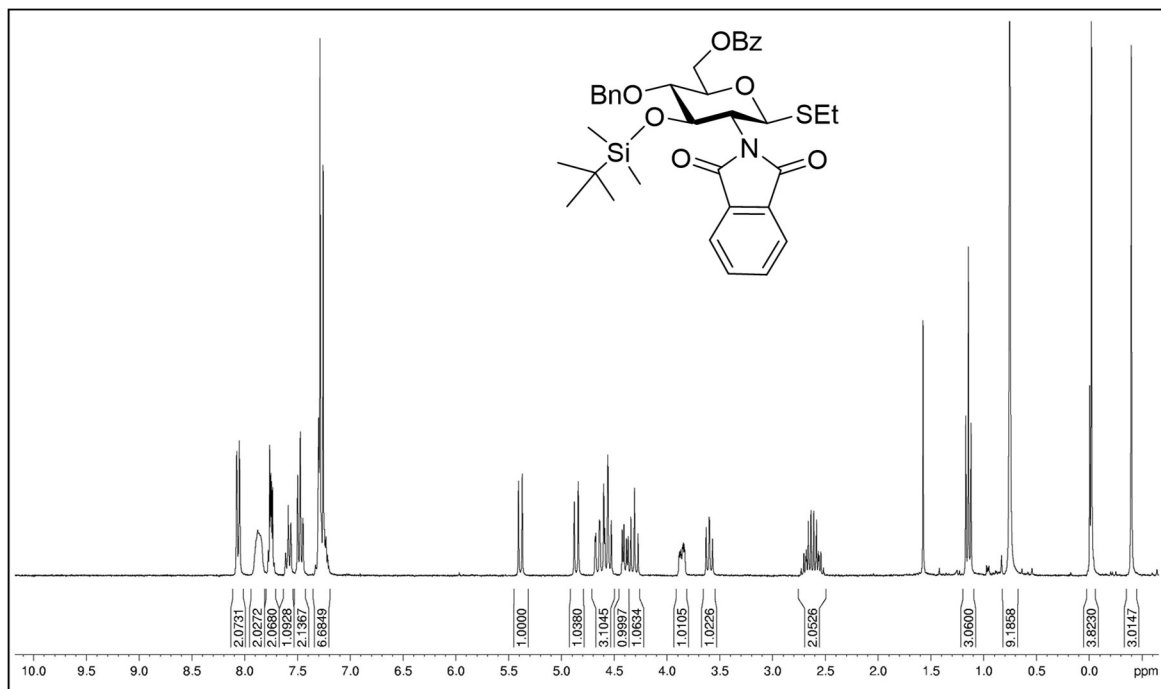

<sup>1</sup>H NMR spectrum (CDCl<sub>3</sub>, 300 MHz)

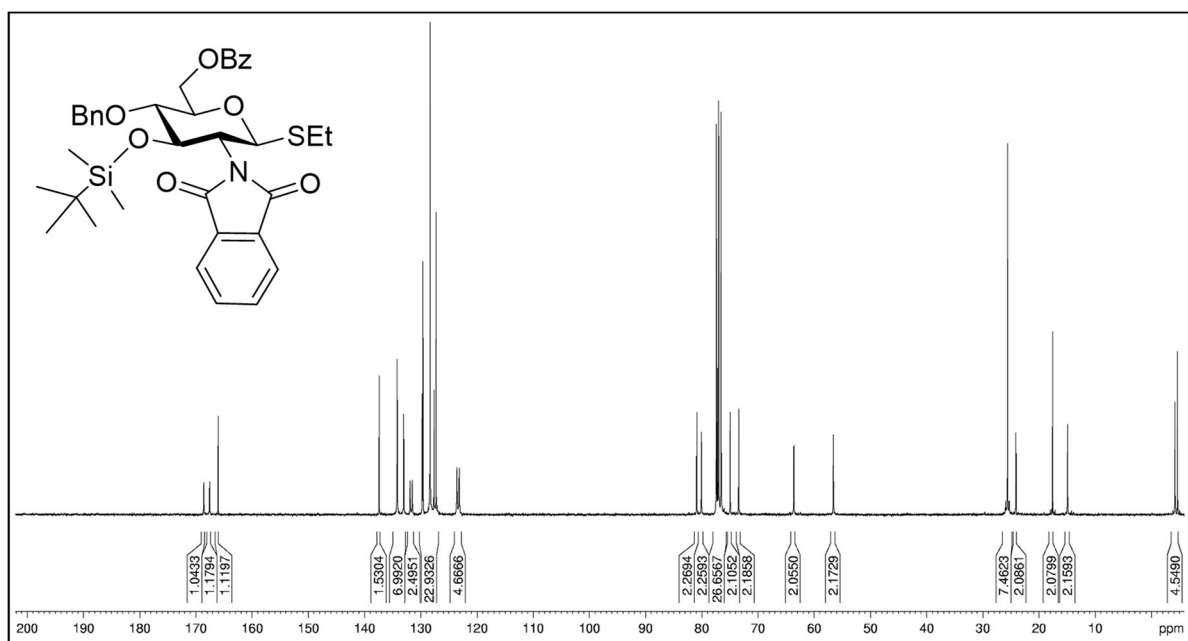

<sup>13</sup>C NMR spectrum (75 MHz, CDCl<sub>3</sub>).

**Ethyl 6-O-benzoyl-4-O-benzyl-2-deoxy-2-phthalimido-3-O-tert-butyldimethylsilyl-1-thio-β-D-glucopyranoside (49)**

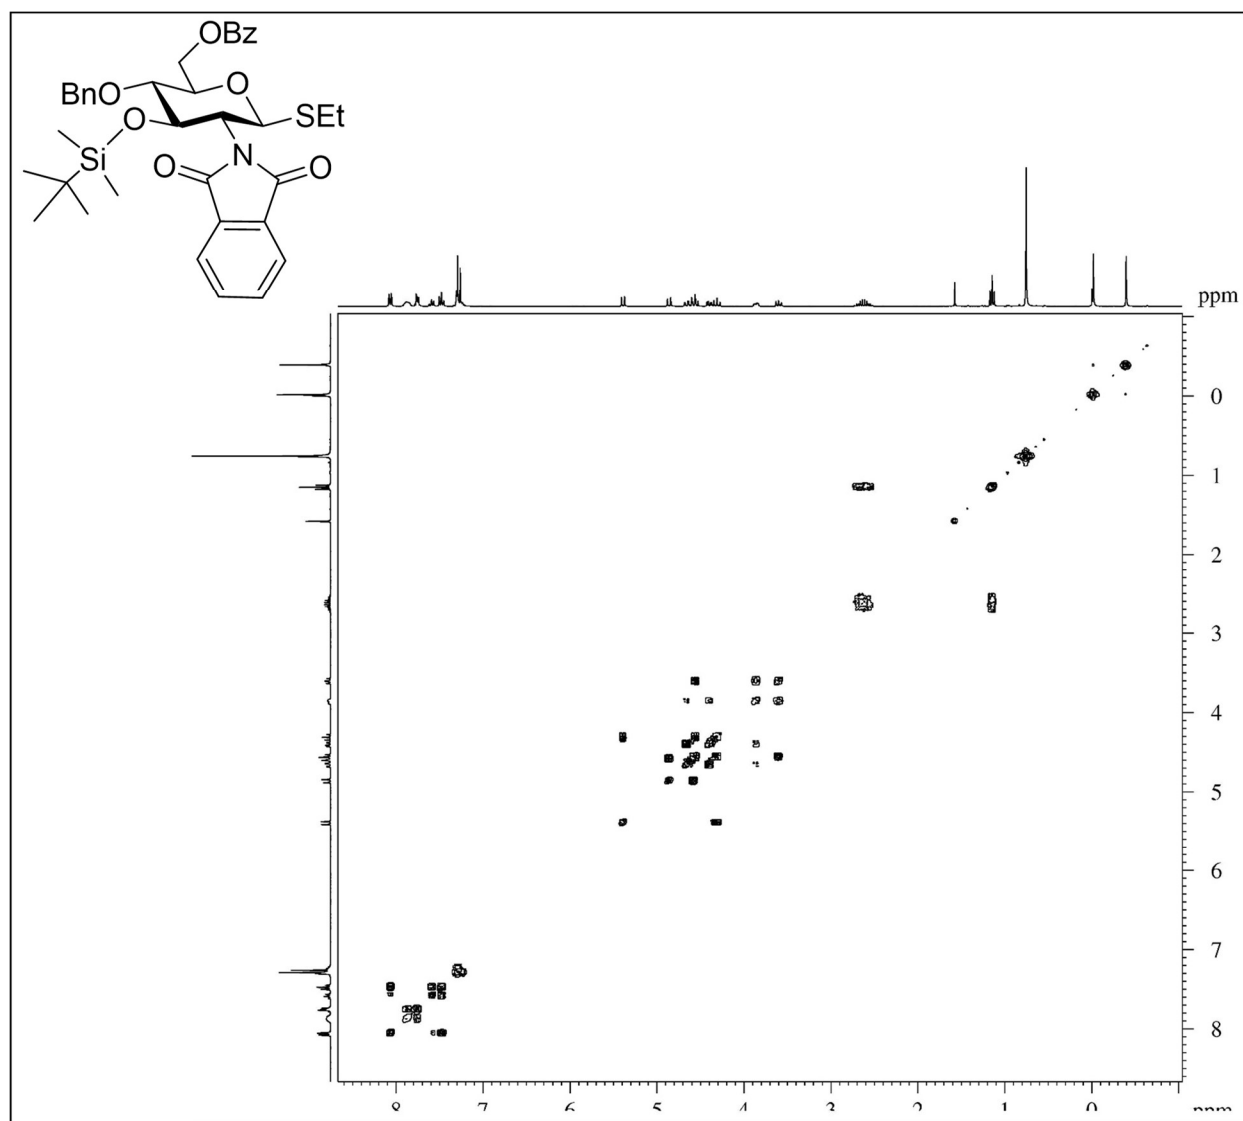

2D NMR (300 MHz, CDCl<sub>3</sub>)



Ethyl 6-*O*-benzoyl-4-*O*-benzyl-2-deoxy-2-phthalimido-1-thio- $\beta$ -D-glucopyranoside (50)

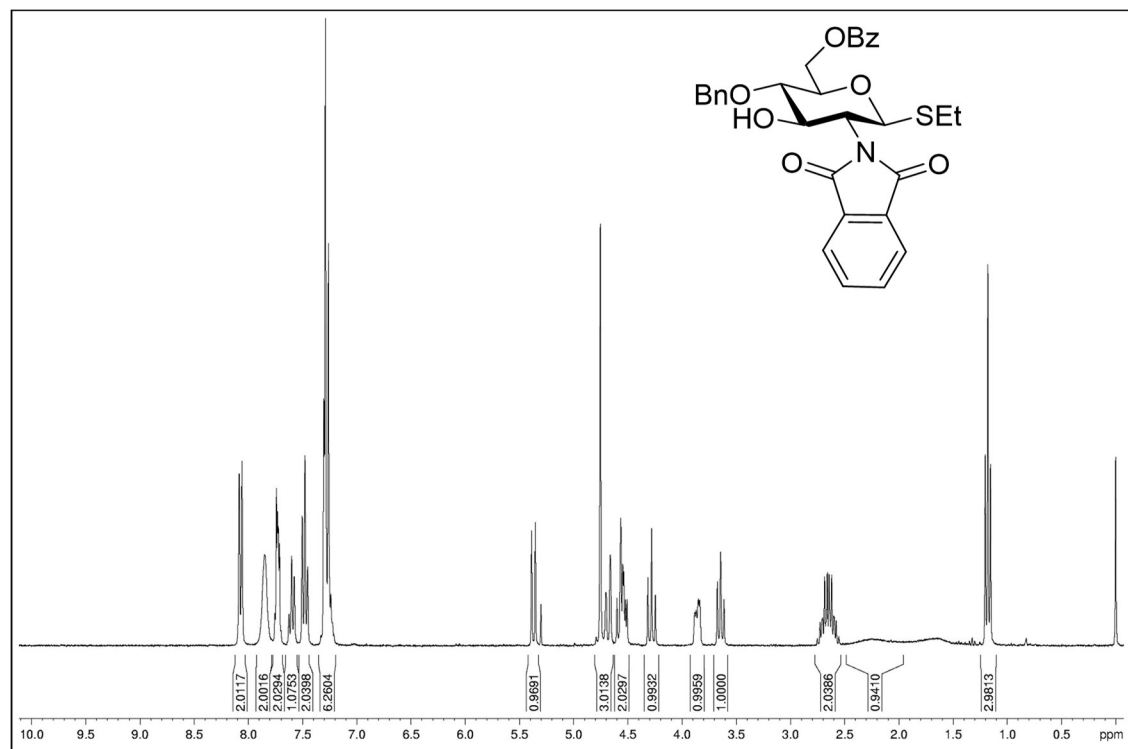

<sup>1</sup>H NMR spectrum (CDCl<sub>3</sub>, 300 MHz)

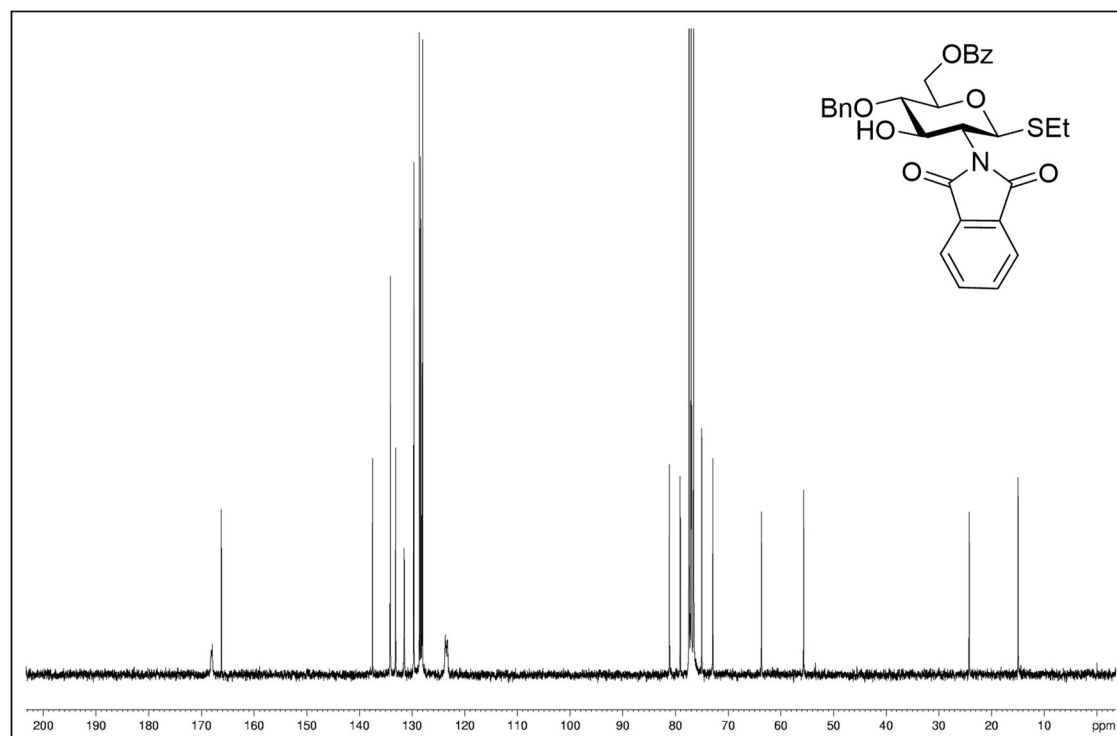

<sup>13</sup>C NMR spectrum (75 MHz, CDCl<sub>3</sub>)

Ethyl 6-*O*-benzoyl-4-*O*-benzyl-2-deoxy-2-phthalimido-1-thio- $\beta$ -D-glucopyranoside (**50**)

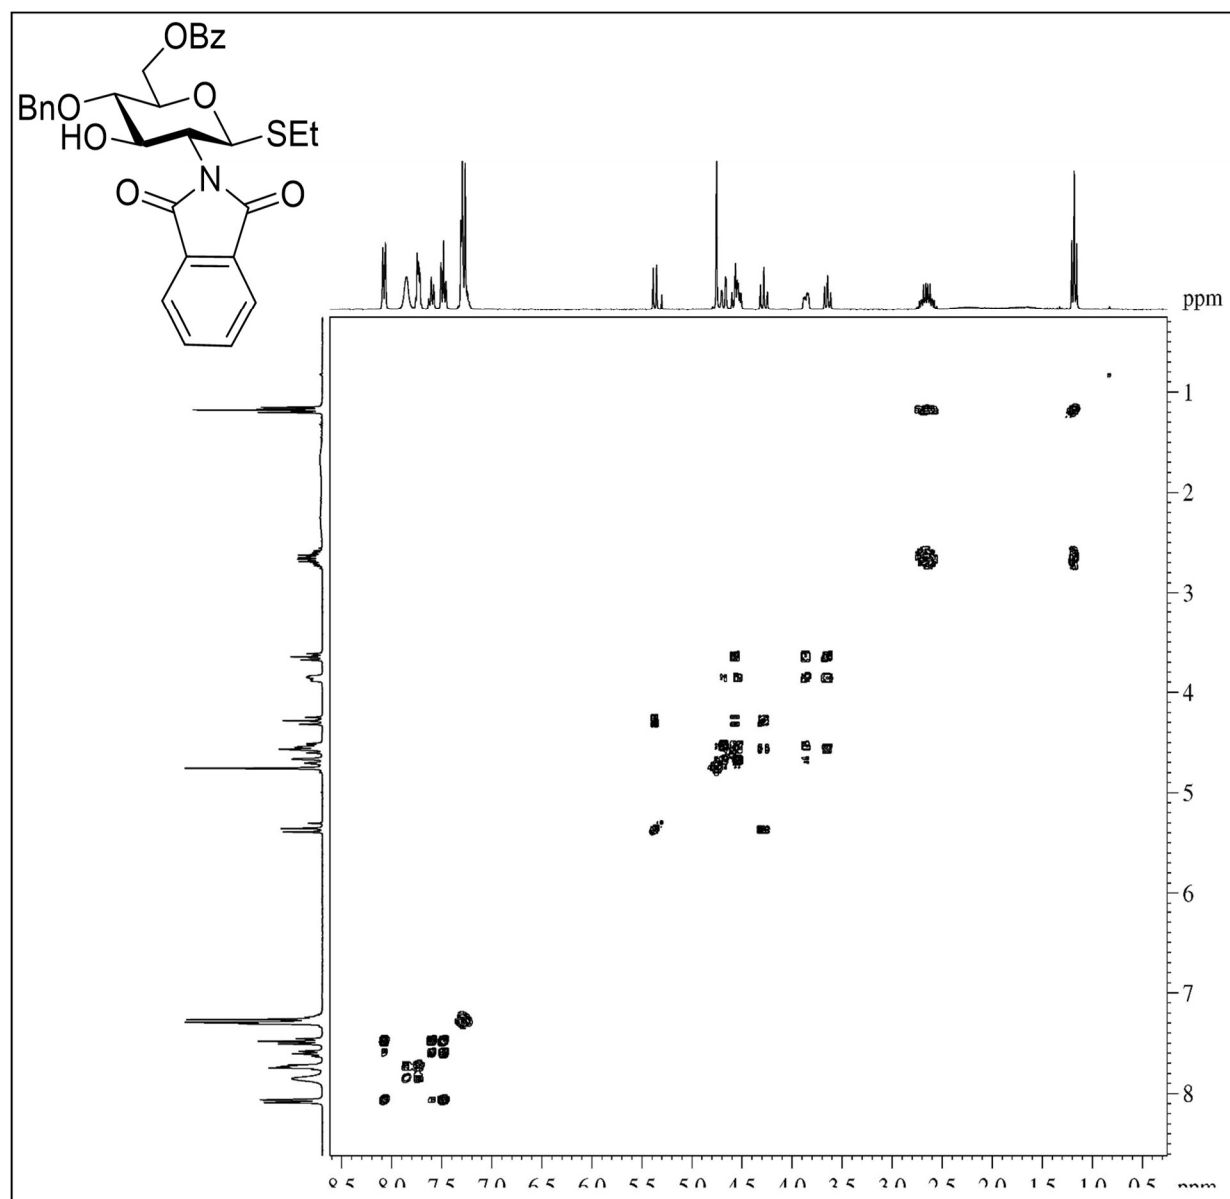

2D NMR (300 MHz,  $\text{CDCl}_3$ )

**Ethyl 6-O-benzoyl-4-O-benzyl-2-deoxy-3-O-levulinoyl-2-phthalimido-1-thio-β-D-glucopyranoside (35)**

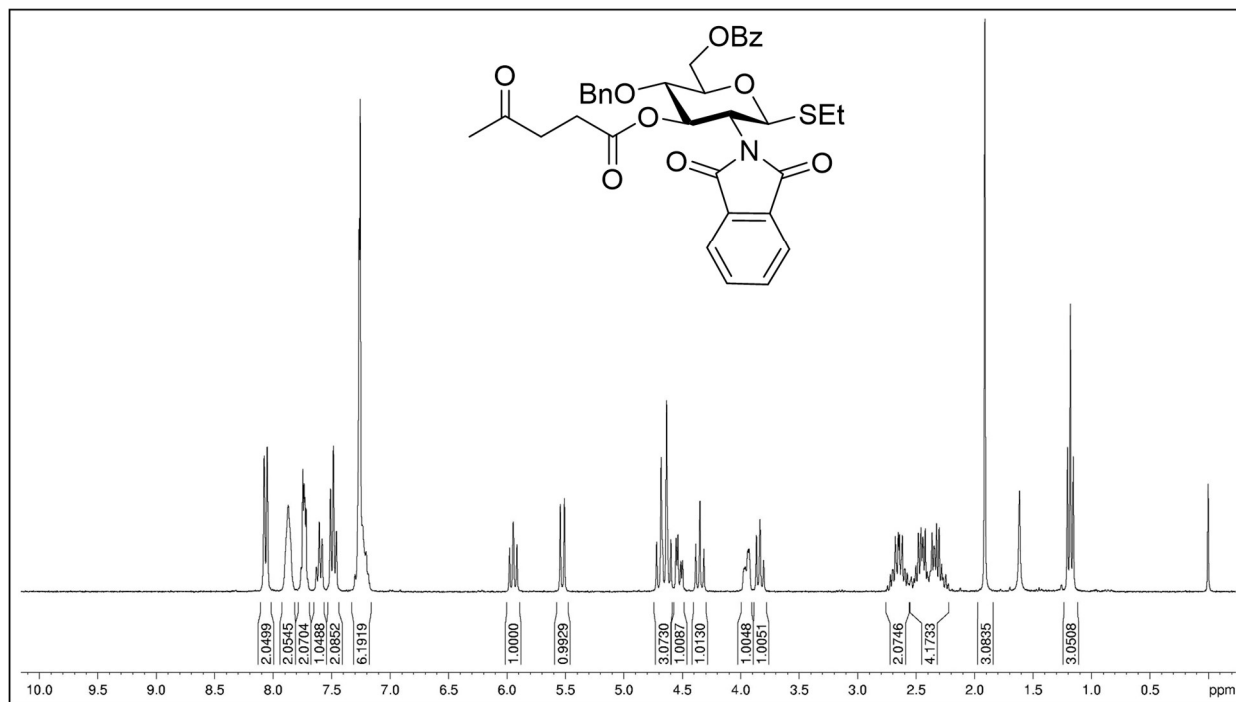

<sup>1</sup>H NMR spectrum (CDCl<sub>3</sub>, 300 MHz)

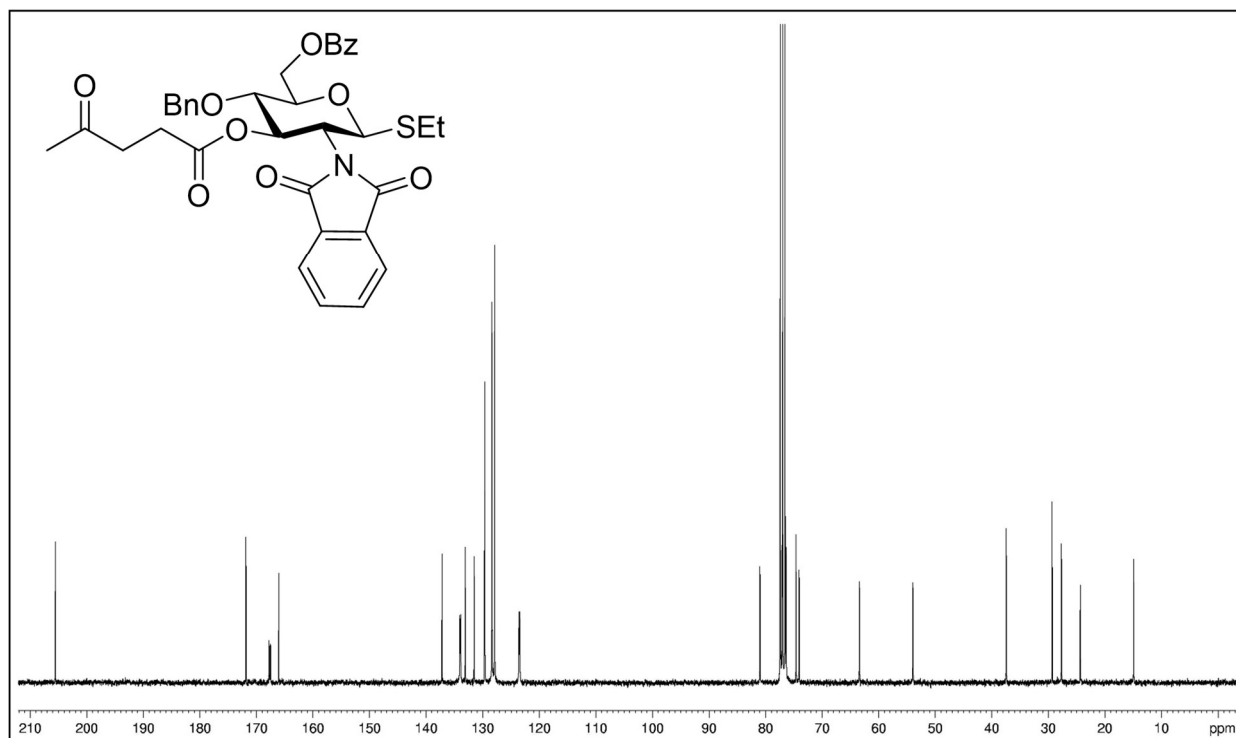

<sup>13</sup>C NMR spectrum (75 MHz, CDCl<sub>3</sub>)

Ethyl 6-*O*-benzoyl-4-*O*-benzyl-2-deoxy-3-*O*-levulinoyl-2-phthalimido-1-thio- $\beta$ -D-glucopyranoside (35)

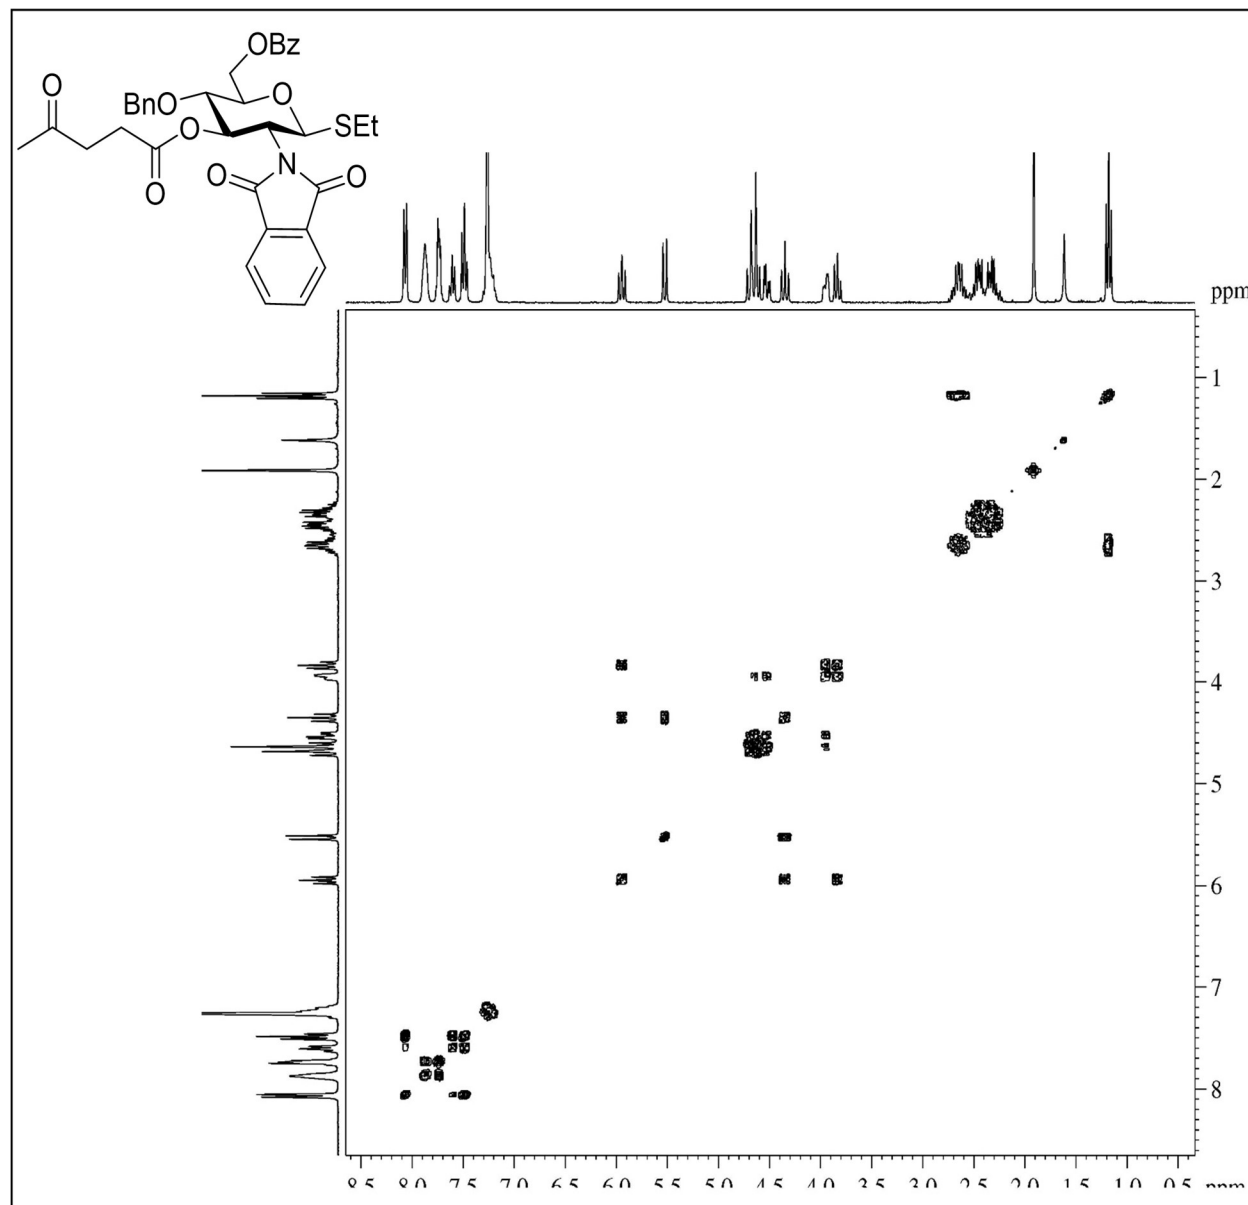

2D NMR (300 MHz,  $\text{CDCl}_3$ )

**Methyl 4,6-di-*O*-(2,3,4,6-tetra-*O*-benzoyl- $\beta$ -D-glucopyranosyl)-2,3-di-*O*-benzyl- $\alpha$ -D-glucopyranoside (25)**

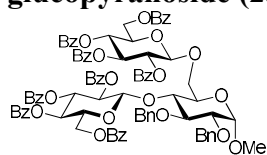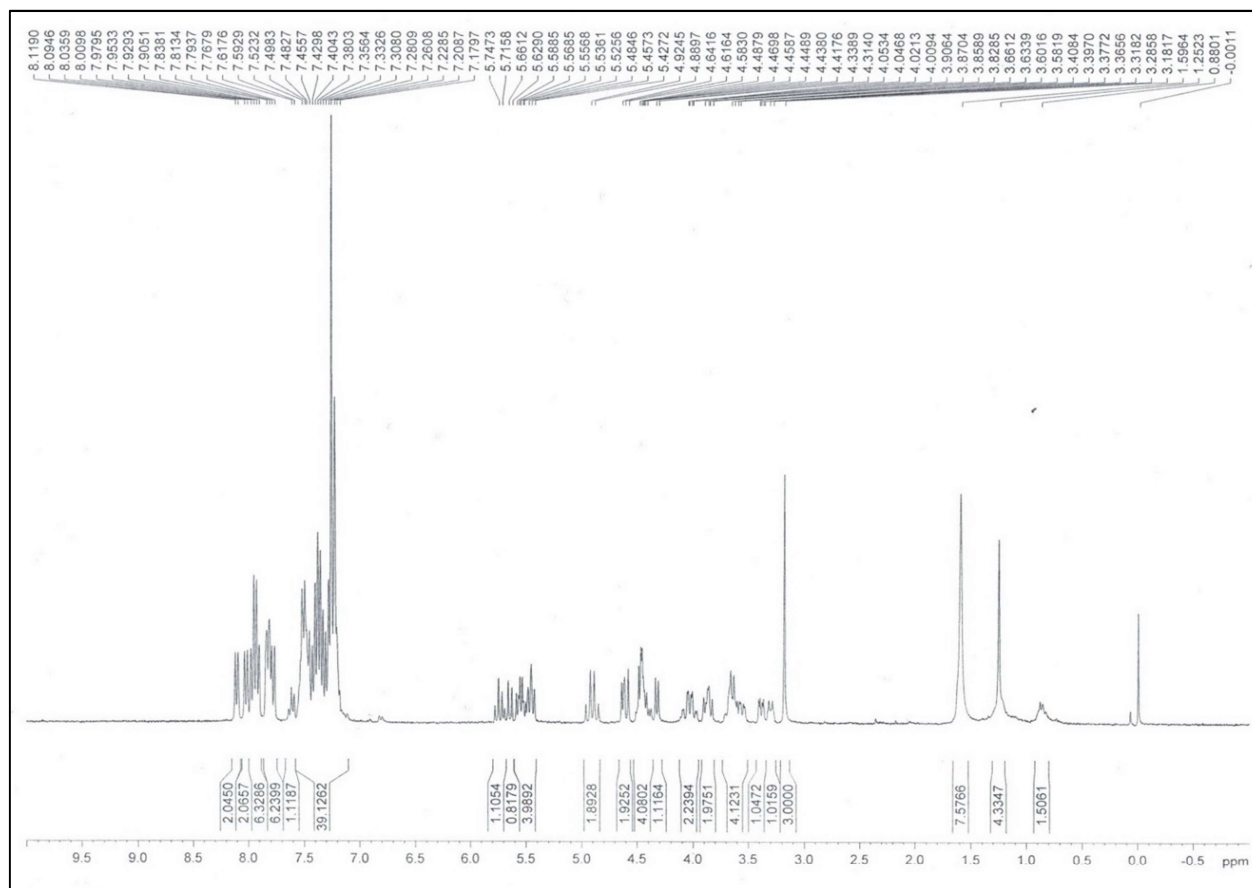

<sup>1</sup>H NMR (300 MHz, CDCl<sub>3</sub>)

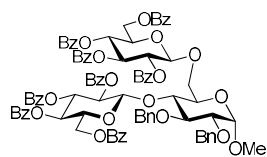

25

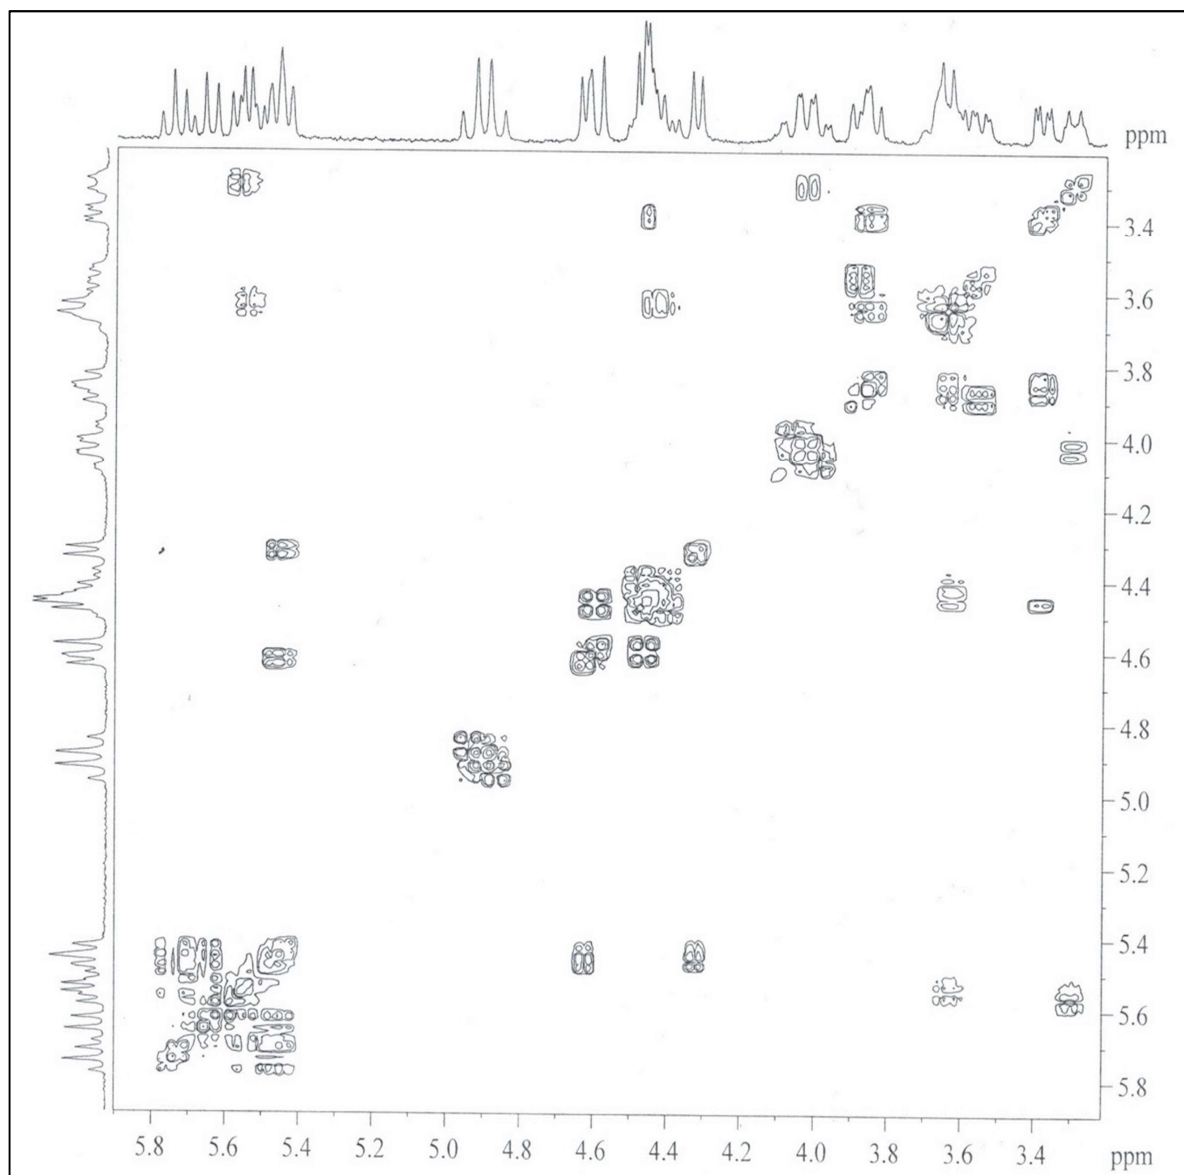

2D NMR (300 MHz, CDCl<sub>3</sub>)

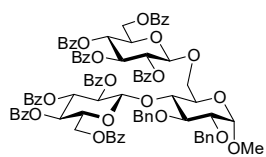

25

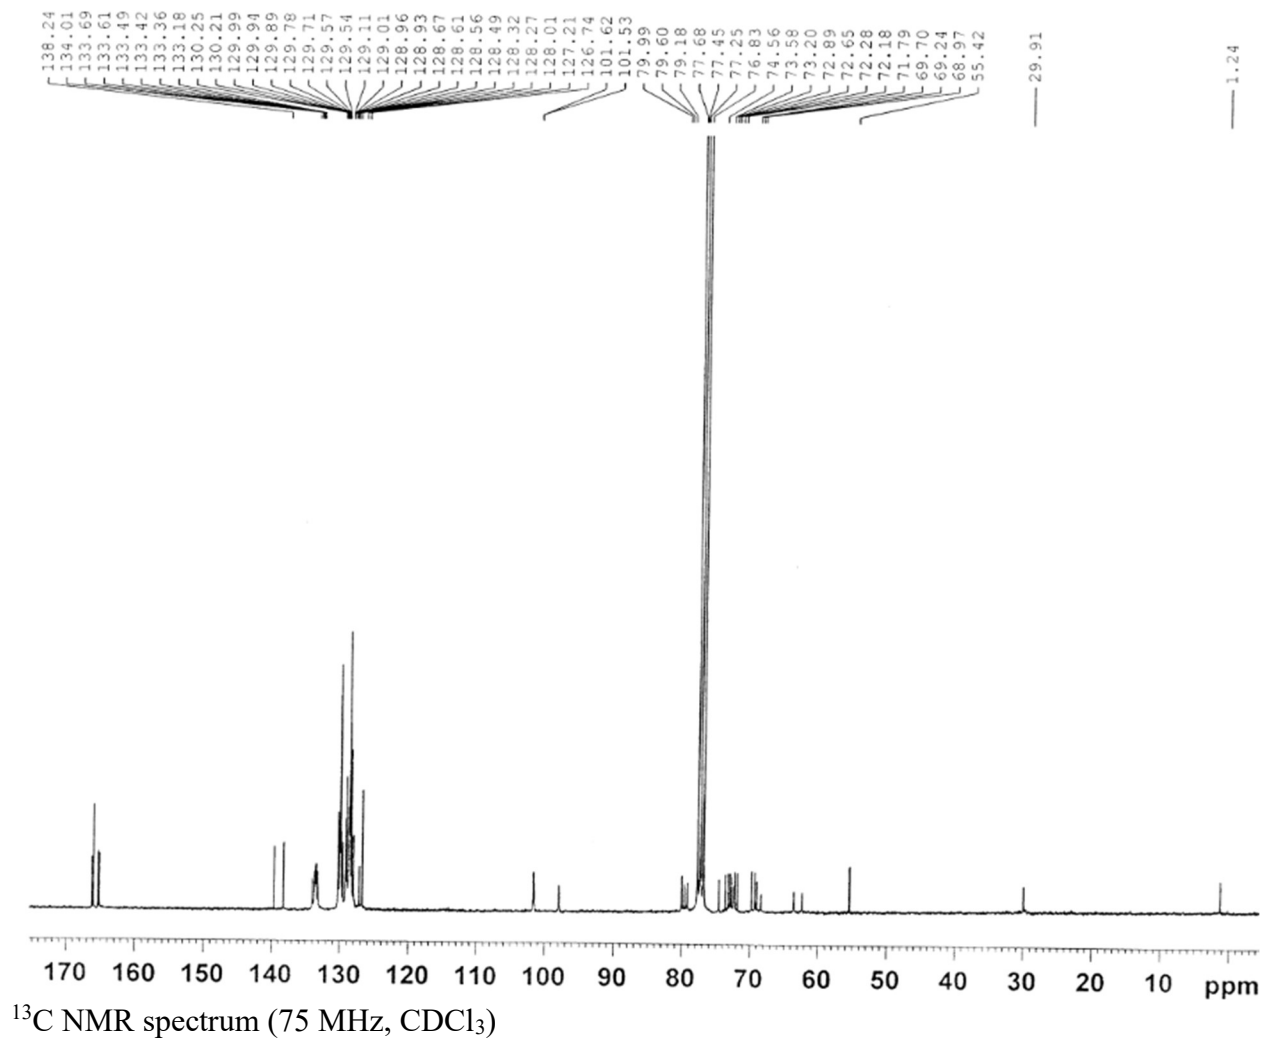

**Methyl 6-O-(2,6-di-O-benzoyl-4-O-benzyl-3-O-tert-butyl dimethylsilyl)- $\beta$ -D-galactopyranosyl)-2,3,4-tri-O-benzyl- $\alpha$ -D-glucopyranoside (42)**

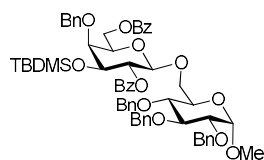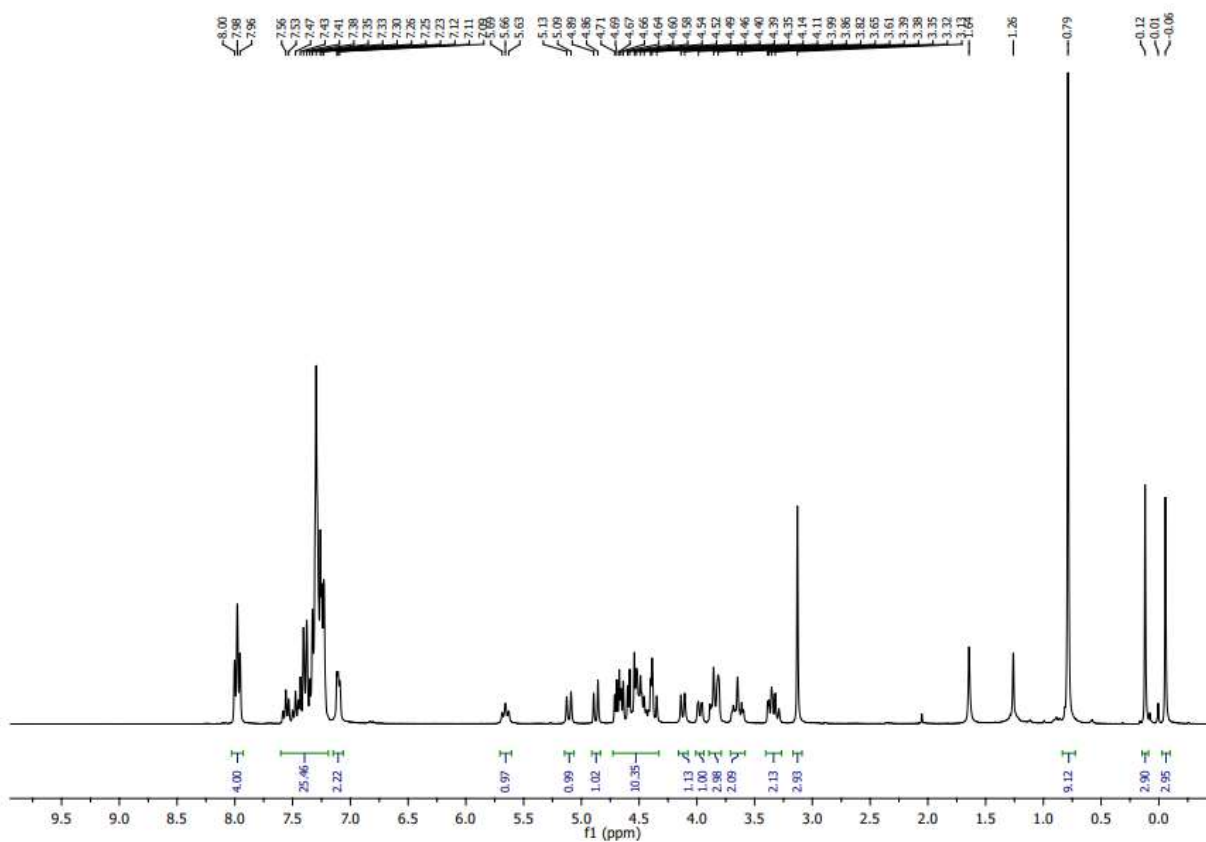

$^1\text{H}$  NMR (300 MHz,  $\text{CDCl}_3$ )



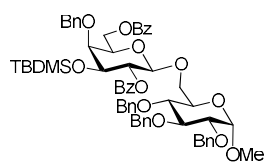

42

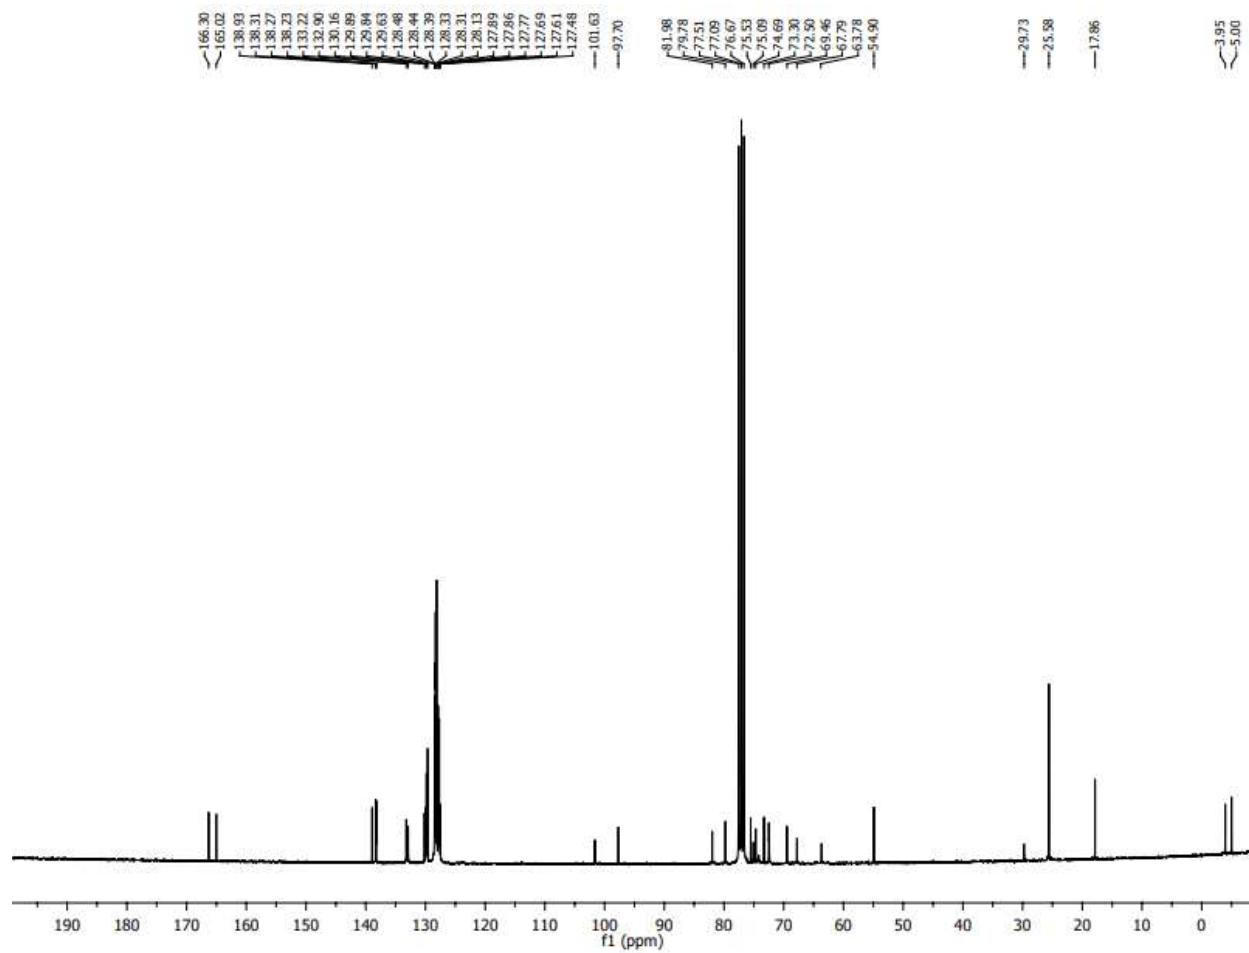

$^{13}\text{C}$  NMR (75 MHz,  $\text{CDCl}_3$ )

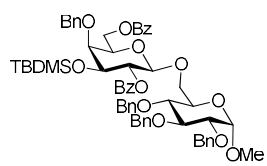

42

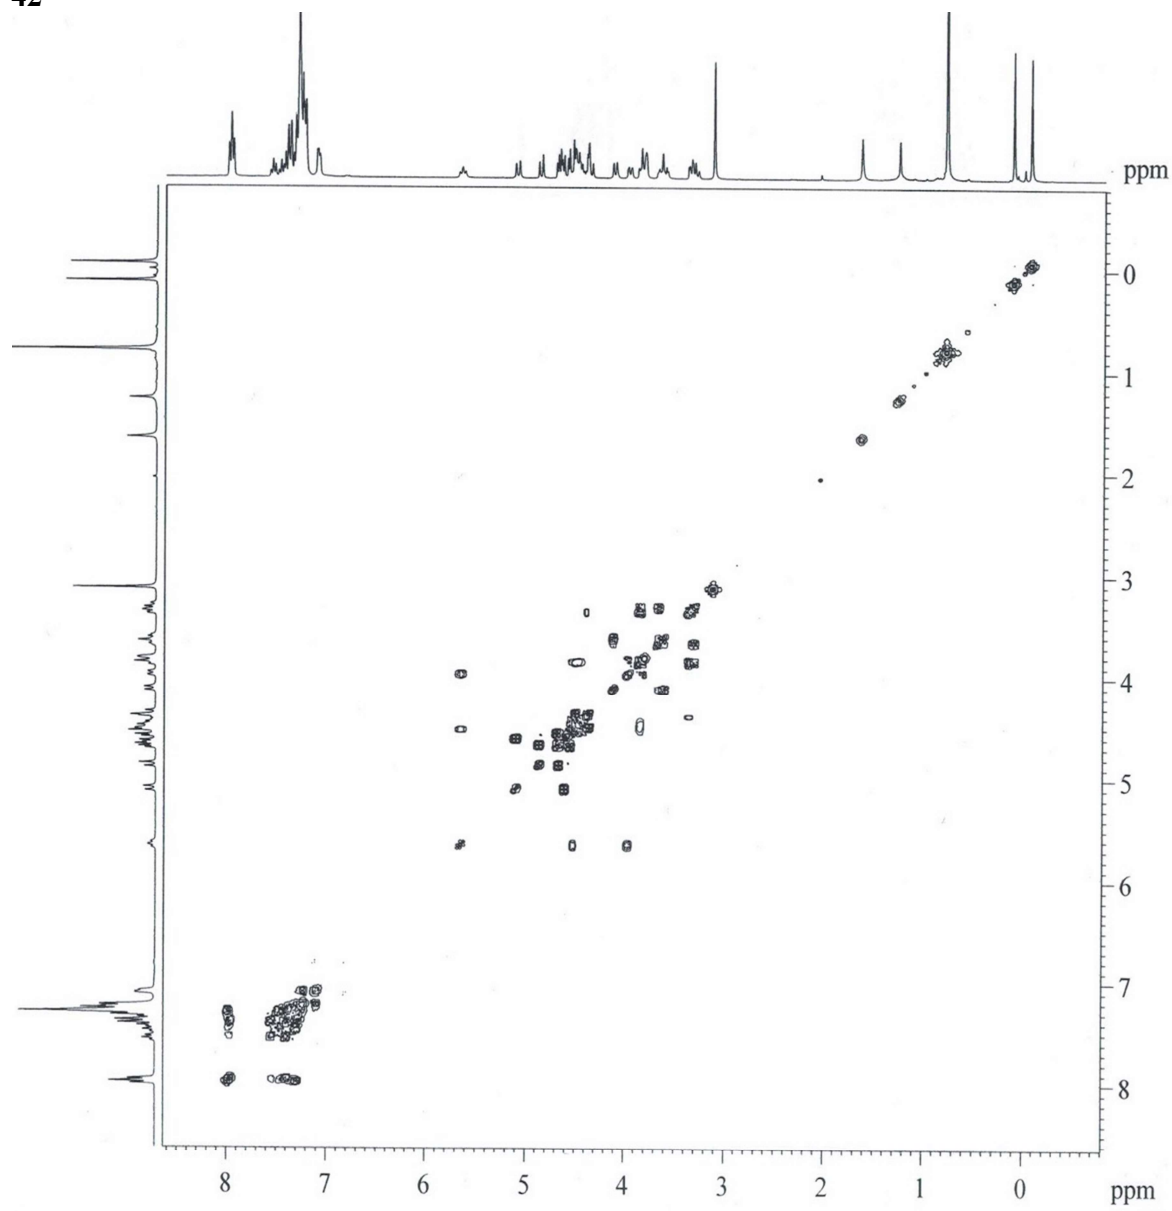

2D NMR (300 MHz, CDCl<sub>3</sub>)

**Methyl 6-O-(4,6-di-O-benzyl-2-deoxy-3-O-levulinoyl-2-phthalimido-β-D-glucopyranosyl)-2,3,4-tri-O-benzyl-α-D-glucopyranoside (43)**

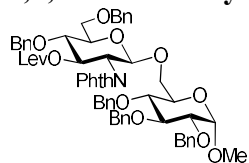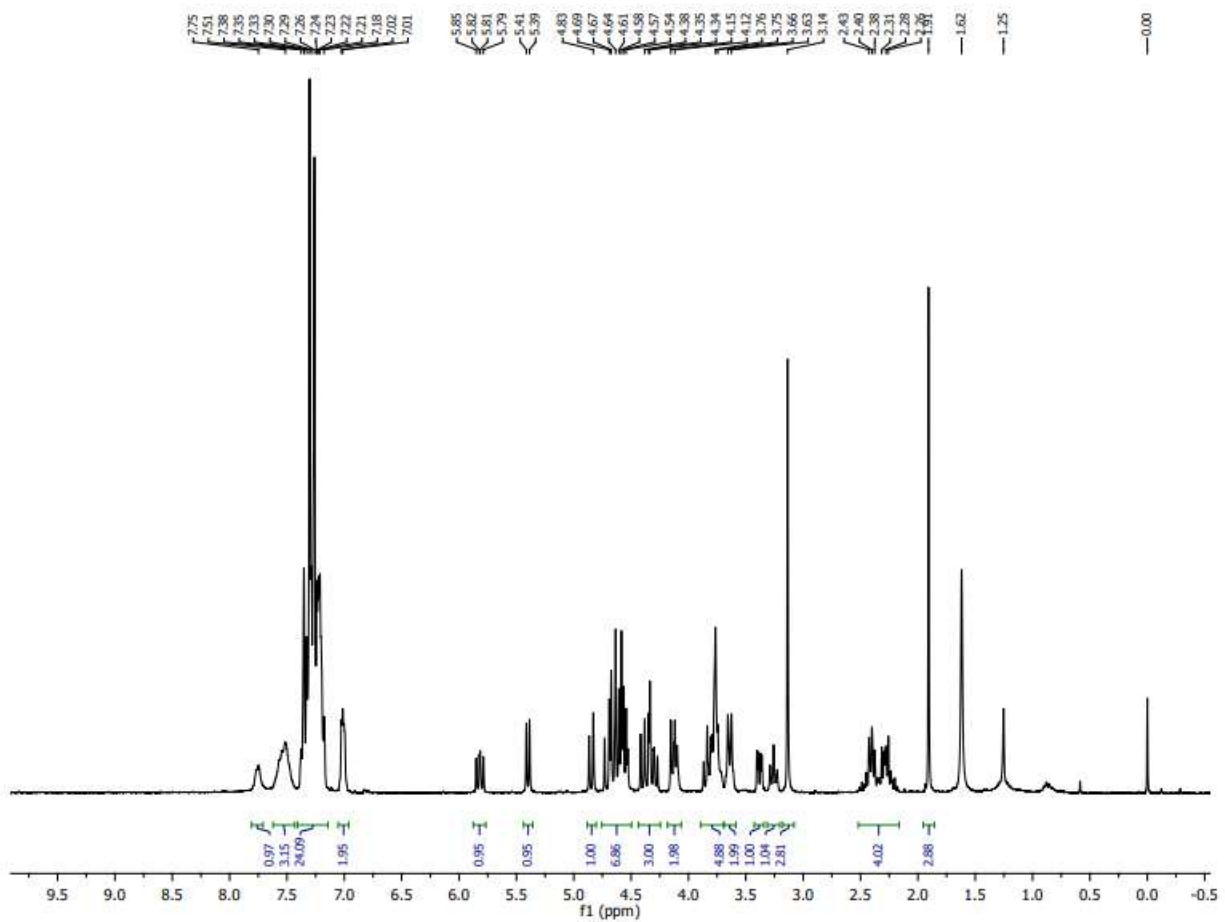

<sup>1</sup>H NMR (300 MHz, CDCl<sub>3</sub>)

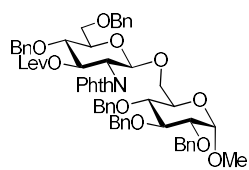

43

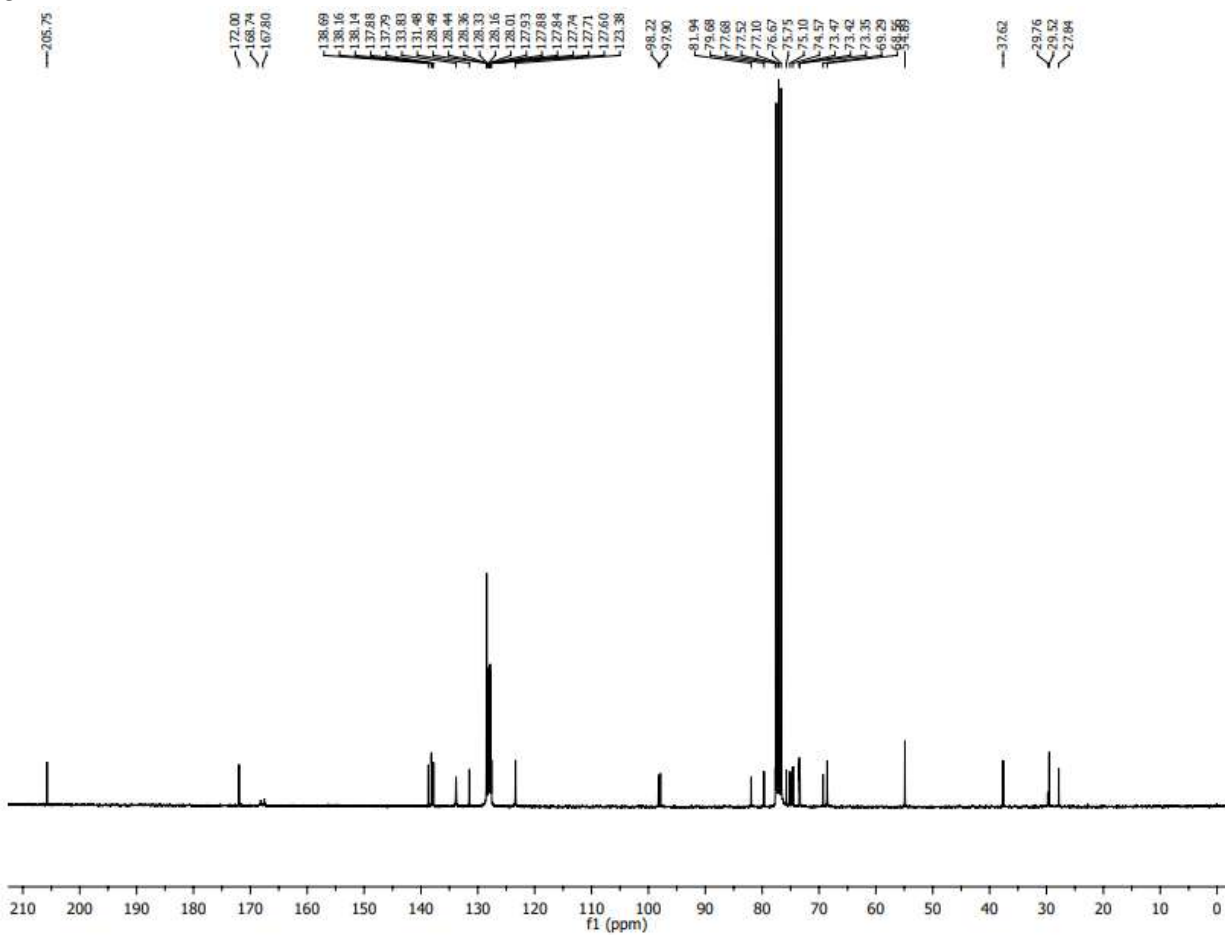

$^{13}\text{C}$  NMR (75 MHz,  $\text{CDCl}_3$ )

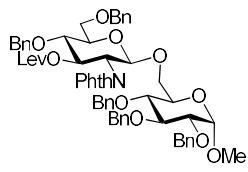

43

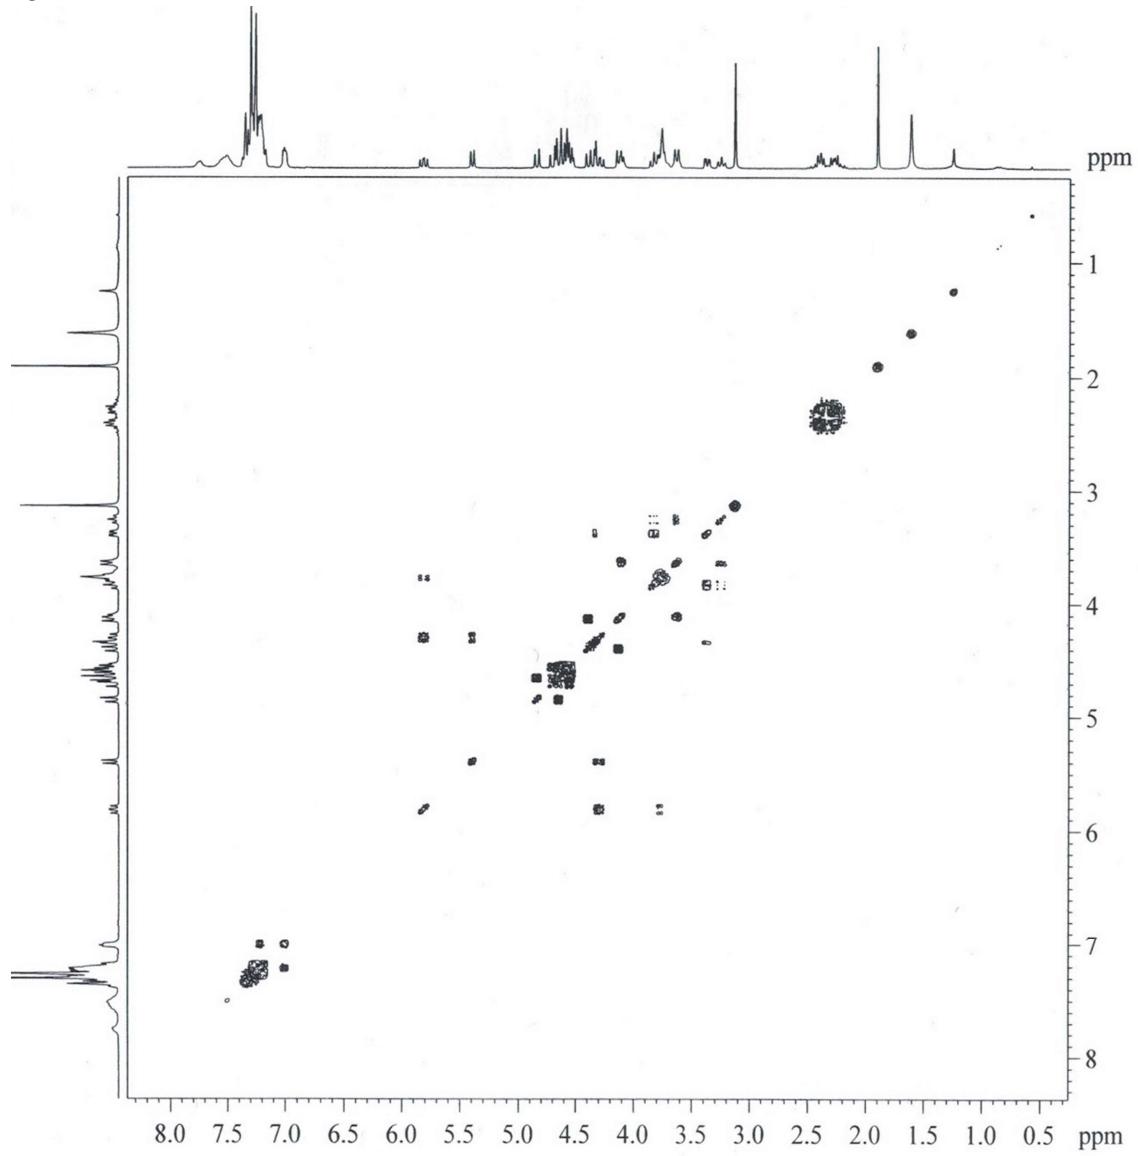

**Methyl 6-O-(6-O-benzoyl-4-O-benzyl-2-deoxy-3-O-levulinoyl-2-phthalimido-β-D-glucopyranosyl)-2,3,4-tri-O-benzyl-α-D-glucopyranoside (44)**

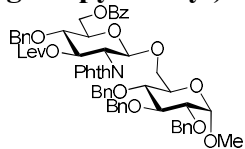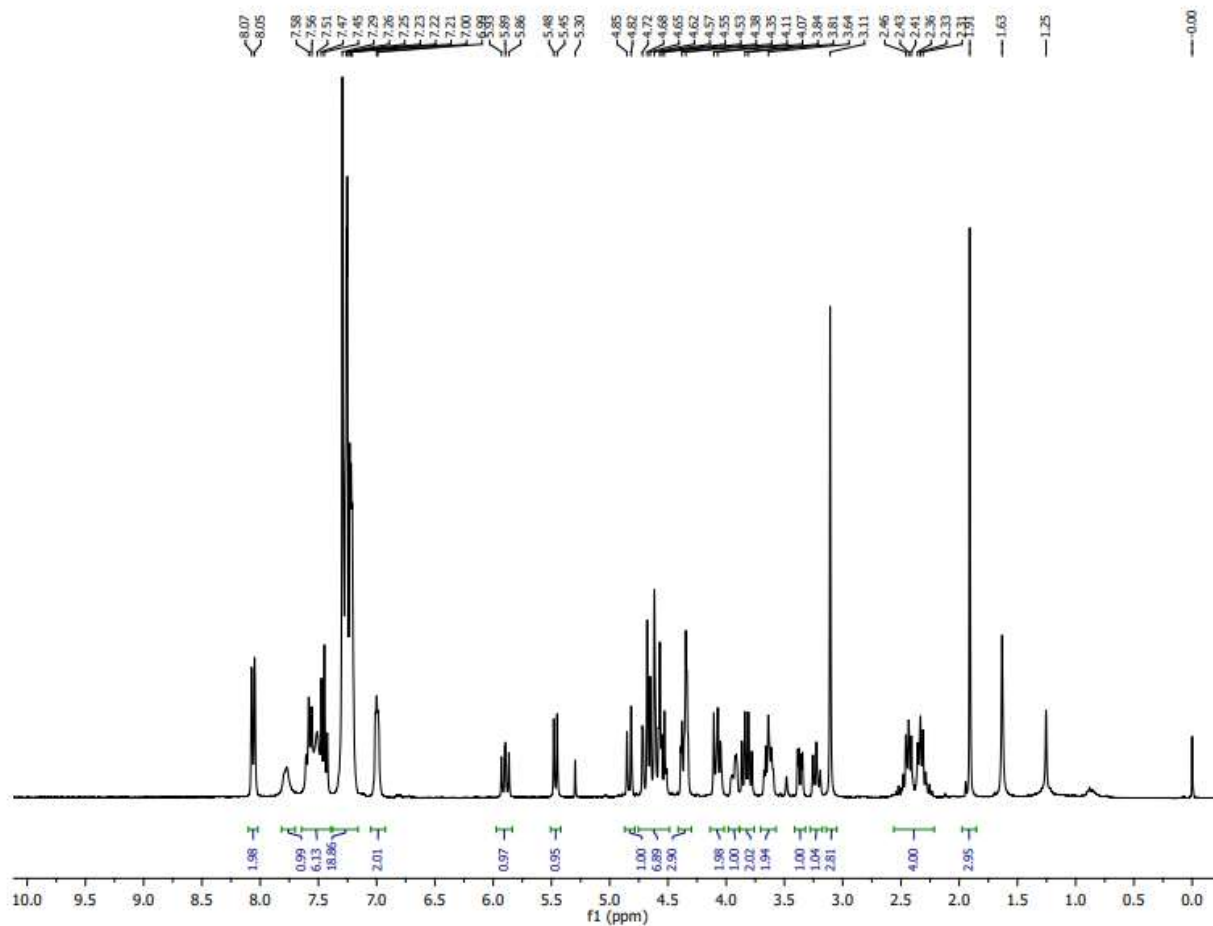

$^1\text{H NMR}$  (300 MHz,  $\text{CDCl}_3$ )

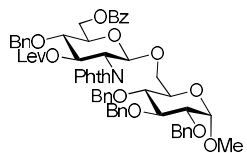

44

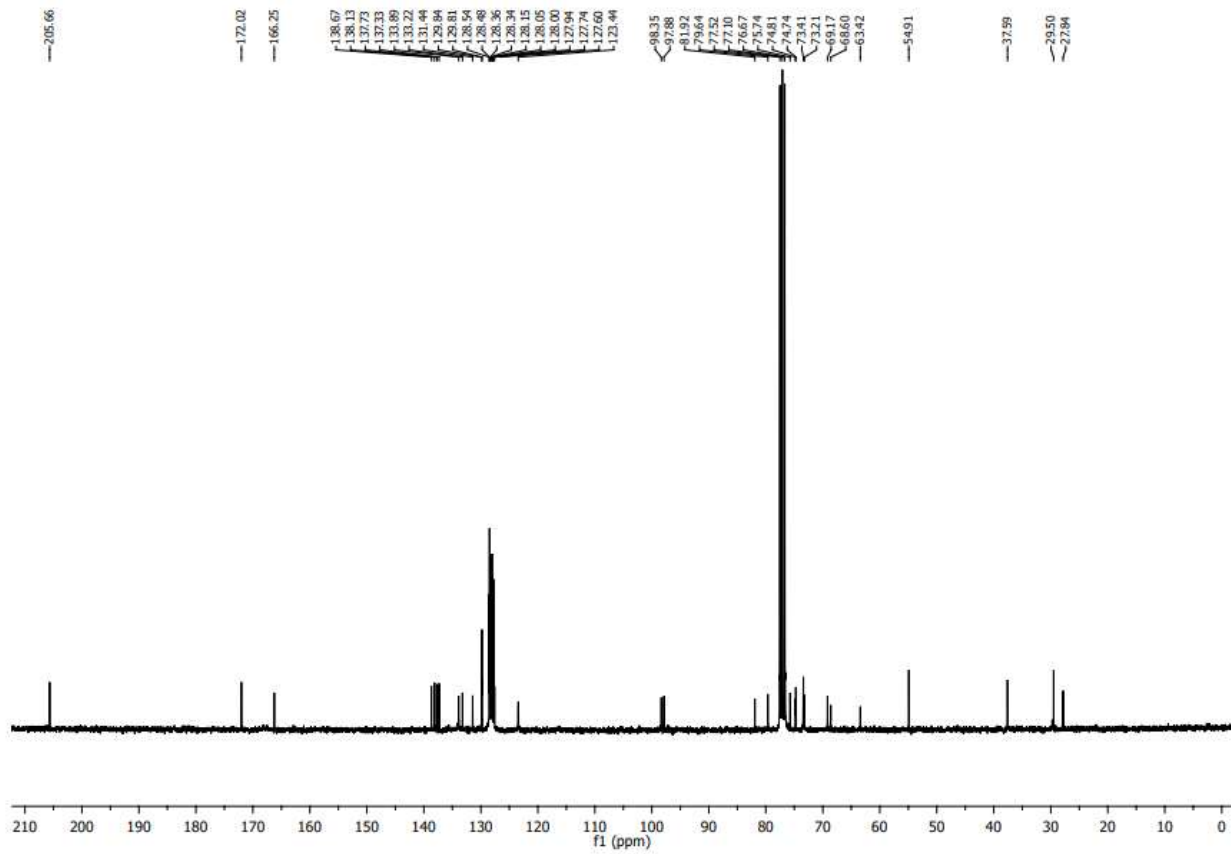

$^{13}\text{C}$  NMR (75 MHz,  $\text{CDCl}_3$ )

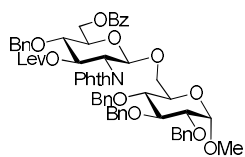

44

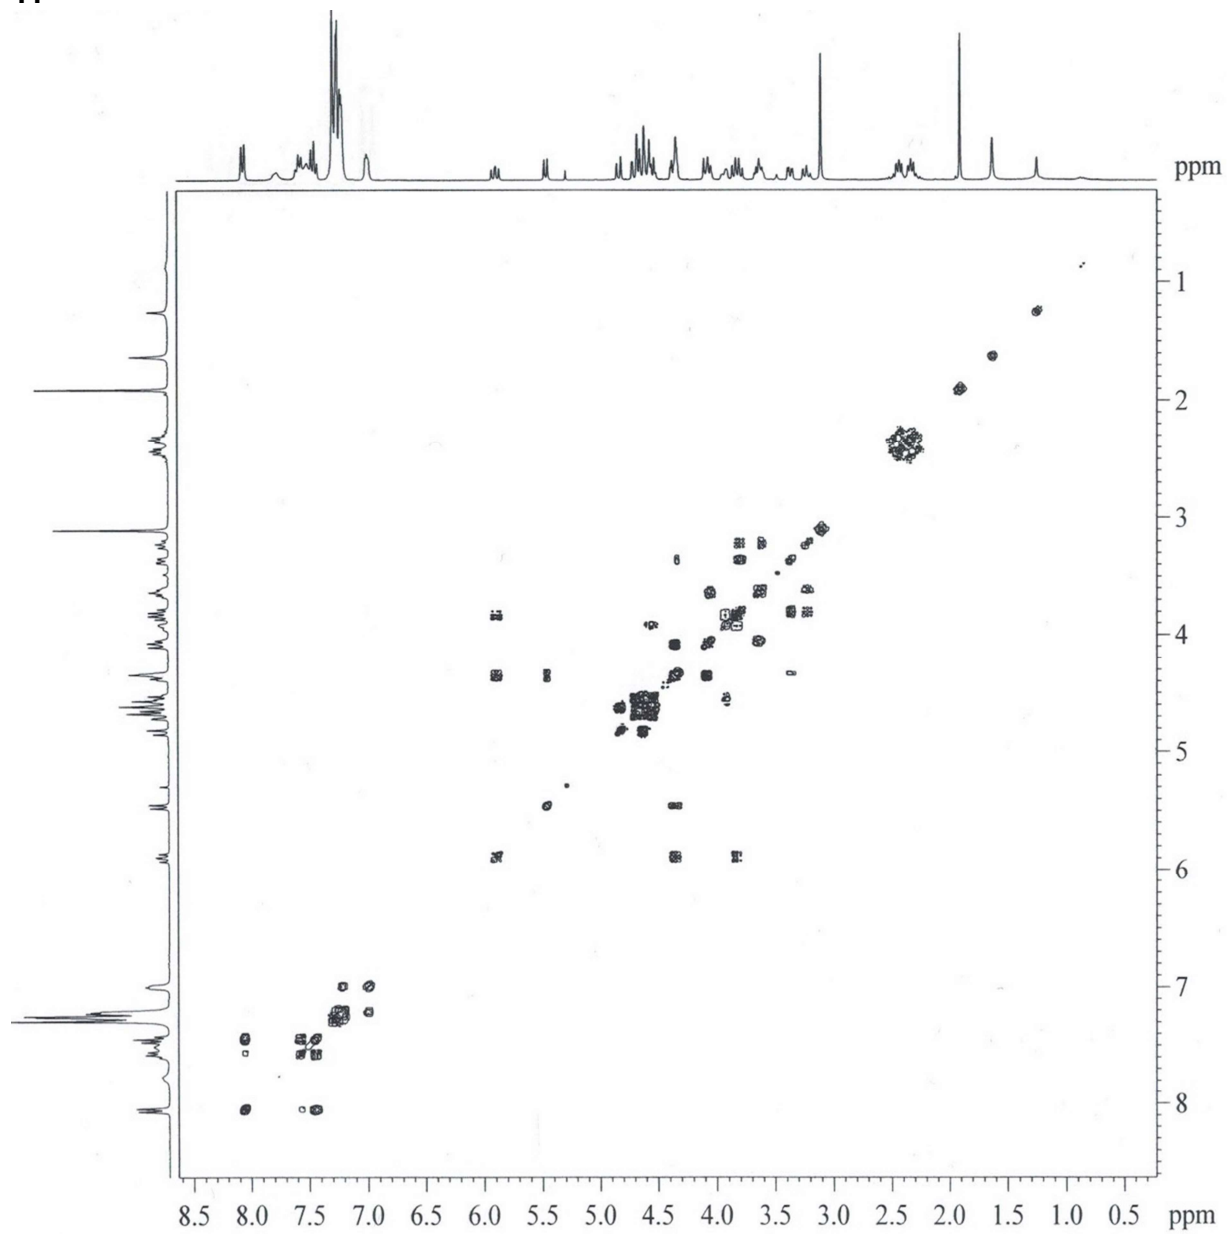

2D NMR (300 MHz, CDCl<sub>3</sub>)



# <sup>1</sup>H NMR Spectra of Known Oligosaccharides

## Methyl 6-*O*-(2,3,4,6-tetra-*O*-benzoyl-β-D-glucopyranosyl)-2,3,4-tri-*O*-benzyl-α-D-glucopyranoside (3)

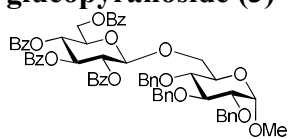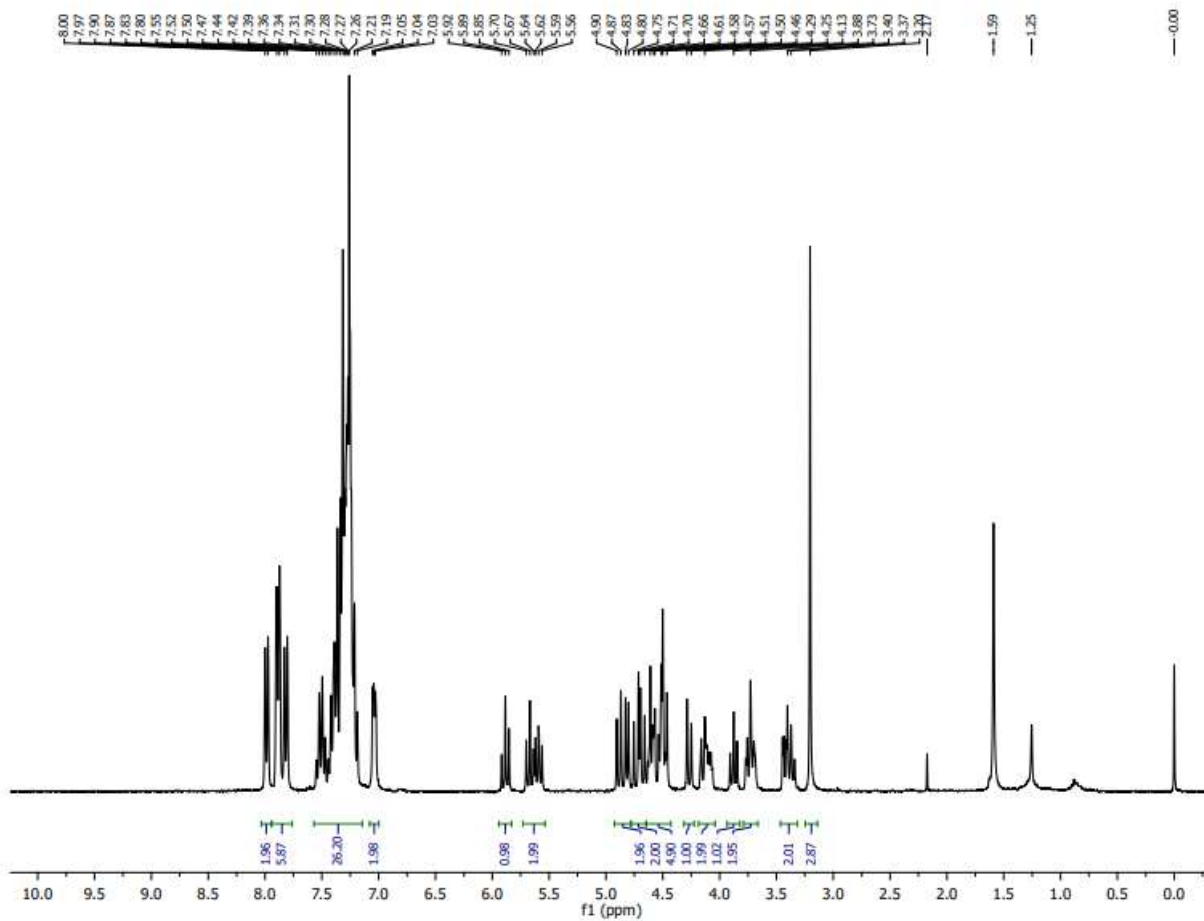

<sup>1</sup>H NMR (300 MHz, CDCl<sub>3</sub>)

**Methyl 4-O-(2,3,4,6-tetra-O-benzoyl-β-D-glucopyranosyl)-2,3,6-tri-O-benzyl-α-D-glucopyranoside (15)**

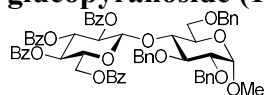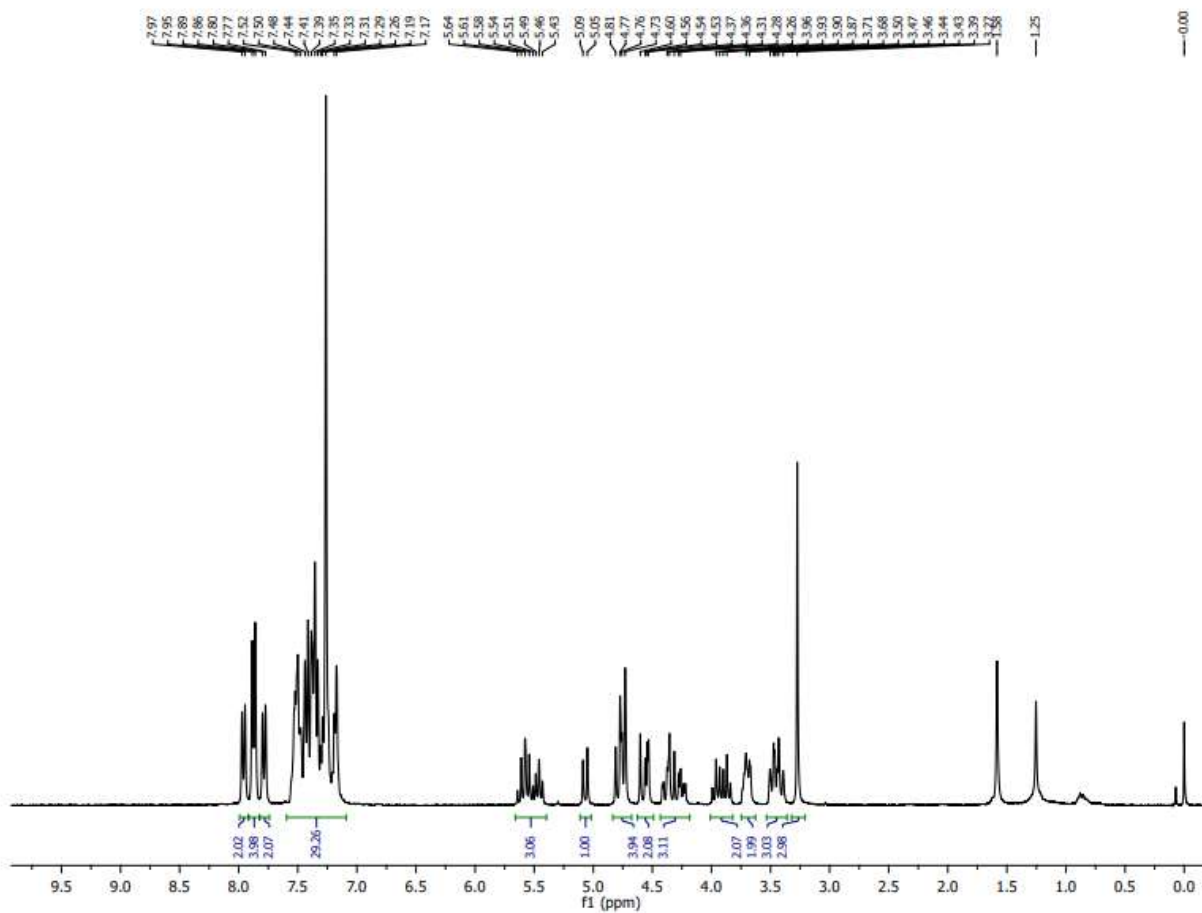

$^1\text{H NMR}$  (300 MHz,  $\text{CDCl}_3$ )

**Methyl 3-O-(2,3,4,6-tetra-O-benzoyl-β-D-glucopyranosyl)-2,4,6-tri-O-benzyl-α-D-glucopyranoside (16)**

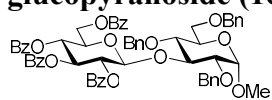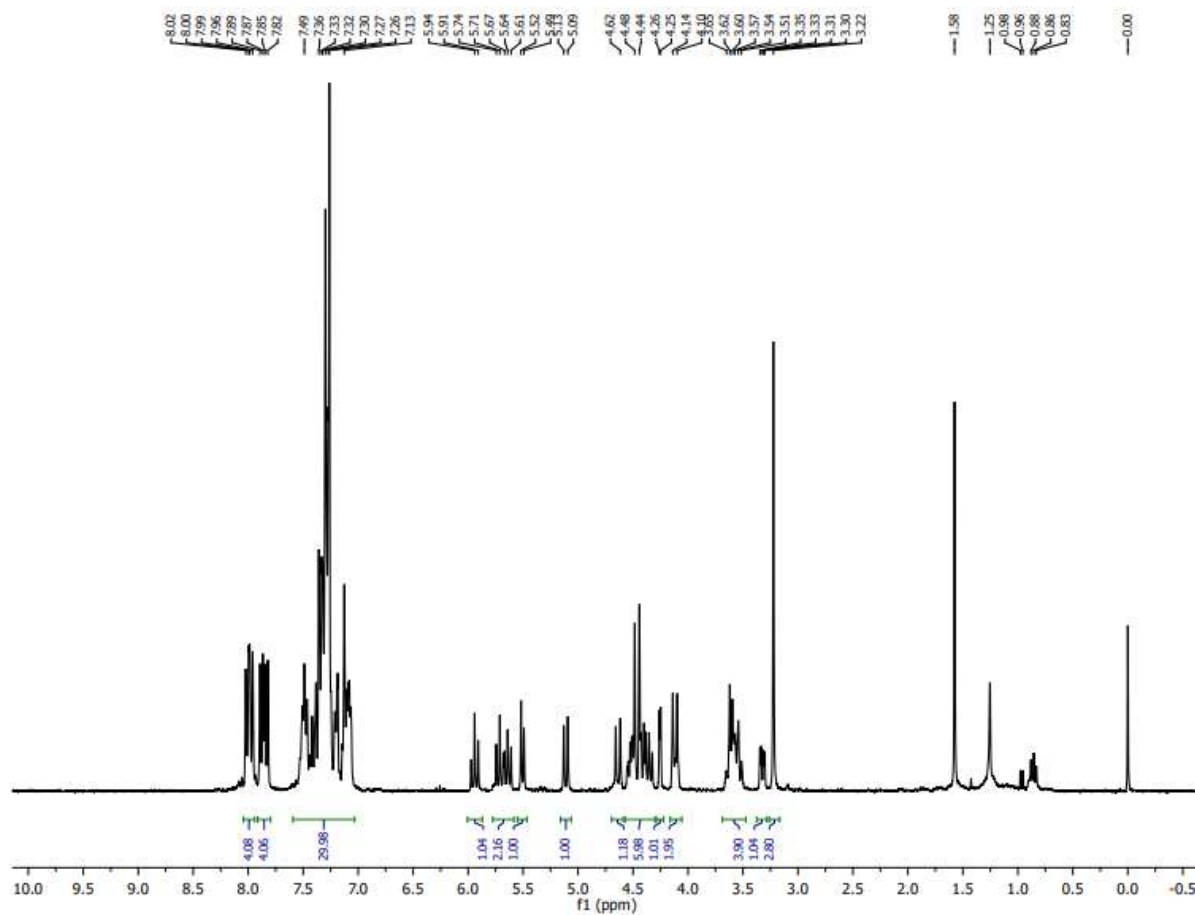

**Methyl 2-O-(2,3,4,6-tetra-O-benzoyl-β-D-glucopyranosyl)-3,4,6-tri-O-benzyl-α-D-glucopyranoside (17)**

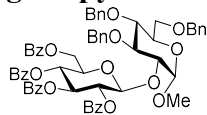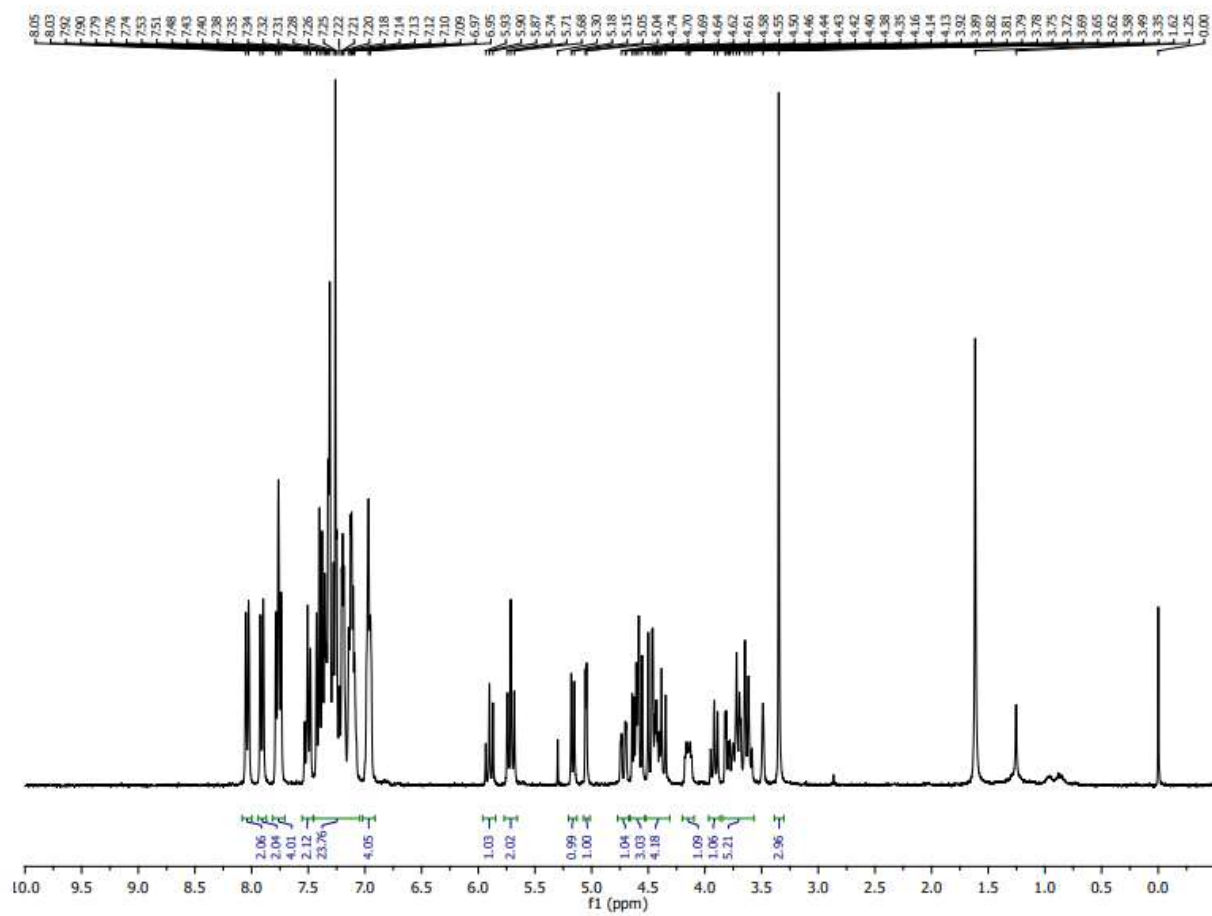

$^1\text{H}$  NMR (300 MHz,  $\text{CDCl}_3$ )

**Methyl 3-*O*-(2,3,4,6-tetra-*O*-benzoyl- $\beta$ -D-glucopyranosyl)-2-*O*-benzyl-4,6-*O*-benzylidene- $\alpha$ -D-glucopyranoside (18)**

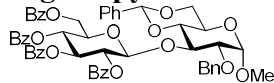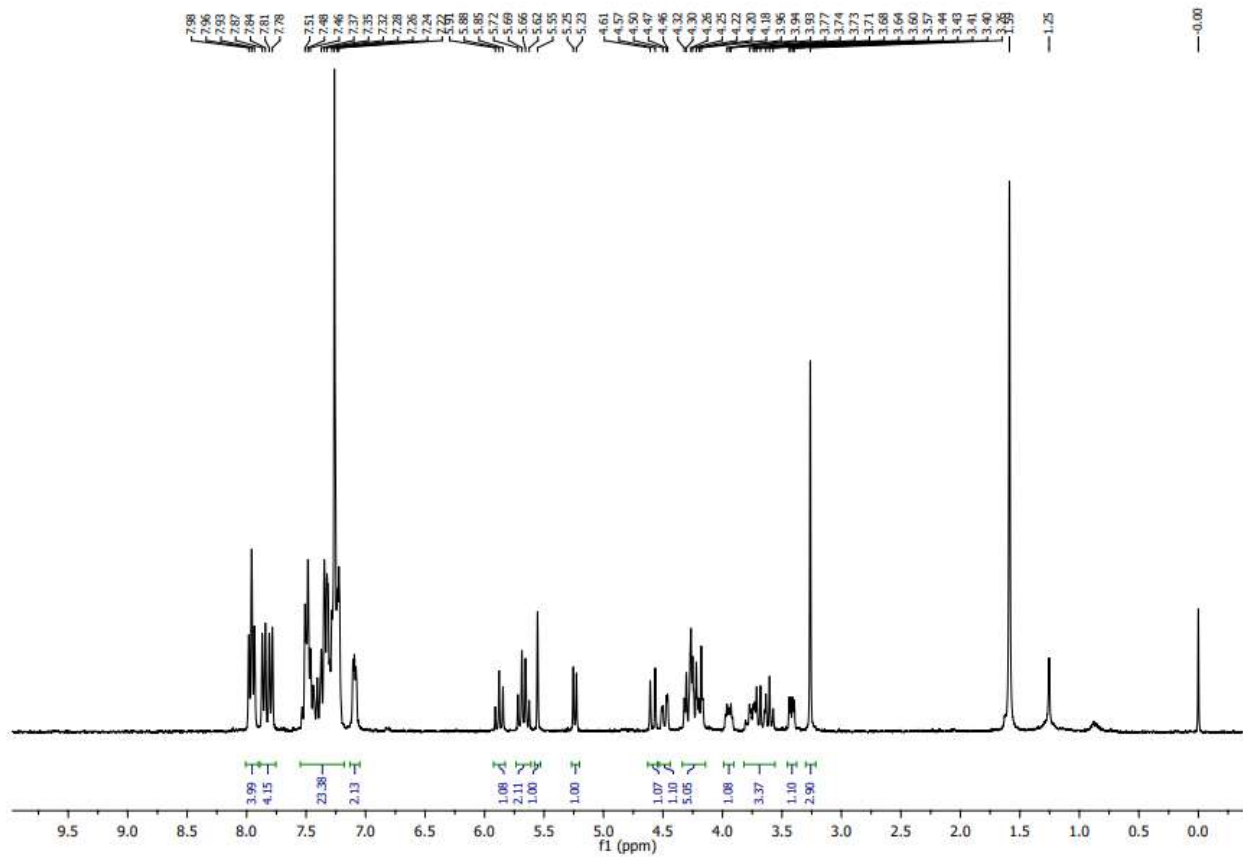

$^1\text{H}$  NMR (300 MHz,  $\text{CDCl}_3$ )

**6-*O*-(2,3,4,6-Tetra-*O*-benzoyl- $\beta$ -D-glucopyranosyl)-1,2:3,4-di-*O*-isopropylidene- $\alpha$ -D-galactopyranose (19)**

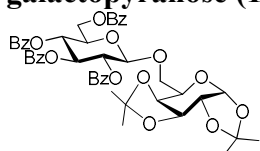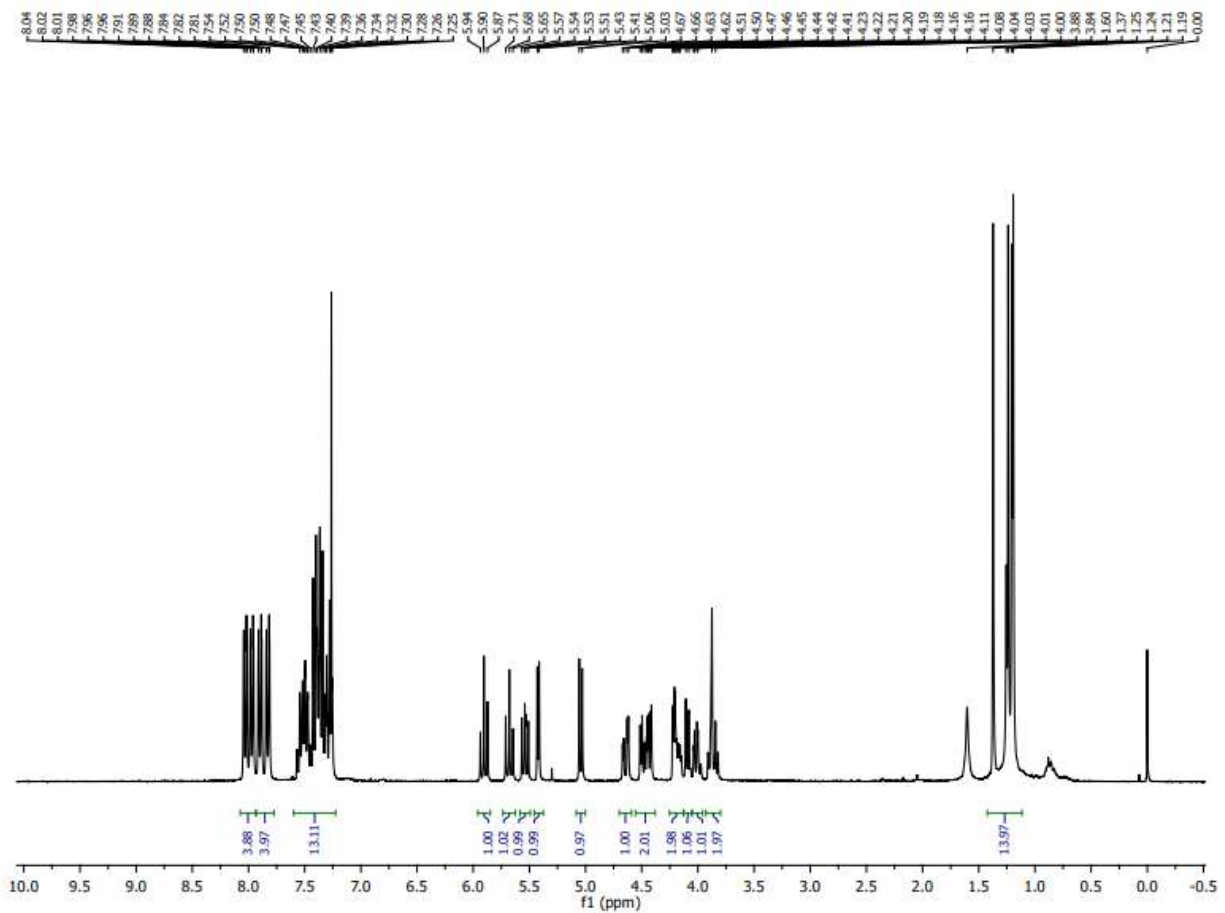

$^1\text{H}$  NMR (300 MHz,  $\text{CDCl}_3$ )

**Methyl 2,3,4-tri-*O*-benzoyl-6-*O*-(2,3,4,6-tetra-*O*-benzoyl- $\beta$ -D-glucopyranosyl)- $\alpha$ -D-glucopyranoside (20)**

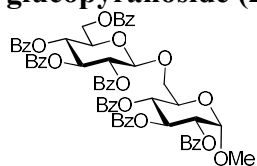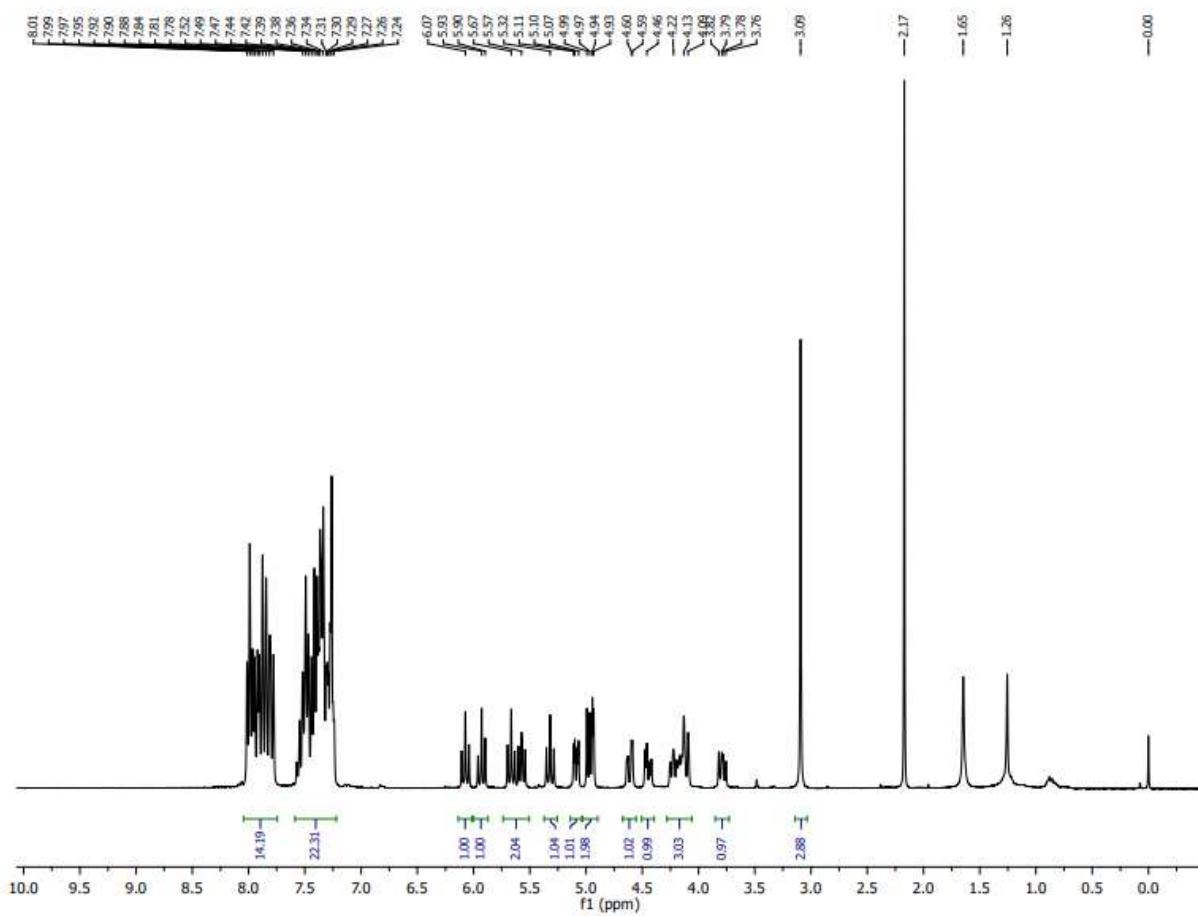

$^1\text{H}$  NMR (300 MHz,  $\text{CDCl}_3$ )

**Ethyl 2,3,4-tri-O-benzoyl-6-O-(2,3,4,6-tetra-O-benzoyl-β-D-glucopyranosyl)-1-thio-β-D-glucopyranoside (21)**

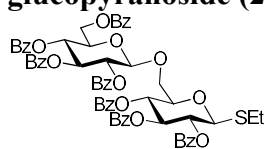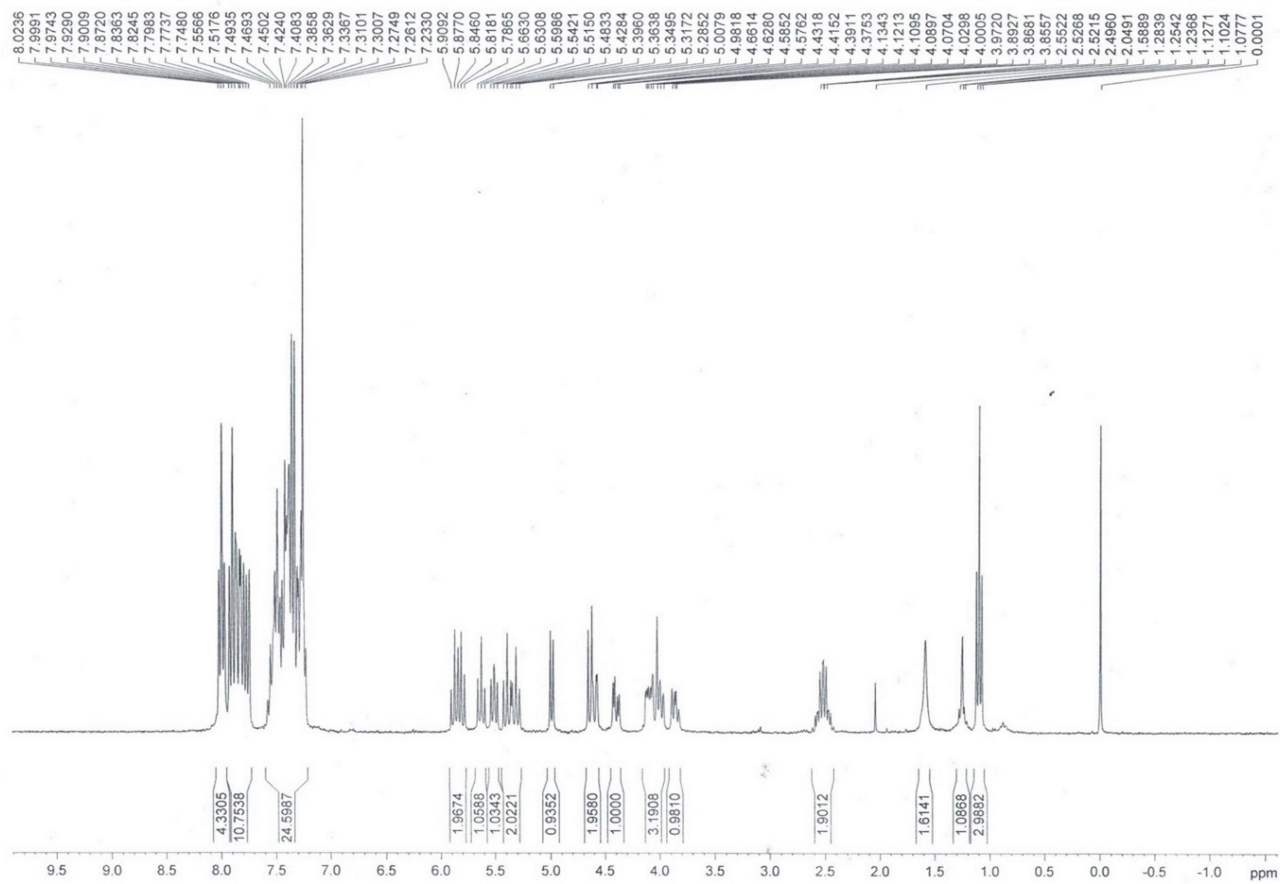

<sup>1</sup>H NMR (300 MHz, CDCl<sub>3</sub>)



*p*-Tolyl 2,3,4-tri-*O*-benzyl-6-*O*-(2,3,4,6-tetra-*O*-benzoyl- $\beta$ -D-glucopyranosyl)-1-thio- $\beta$ -D-glucopyranoside (22)

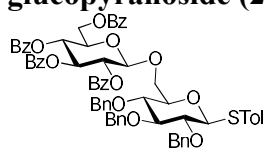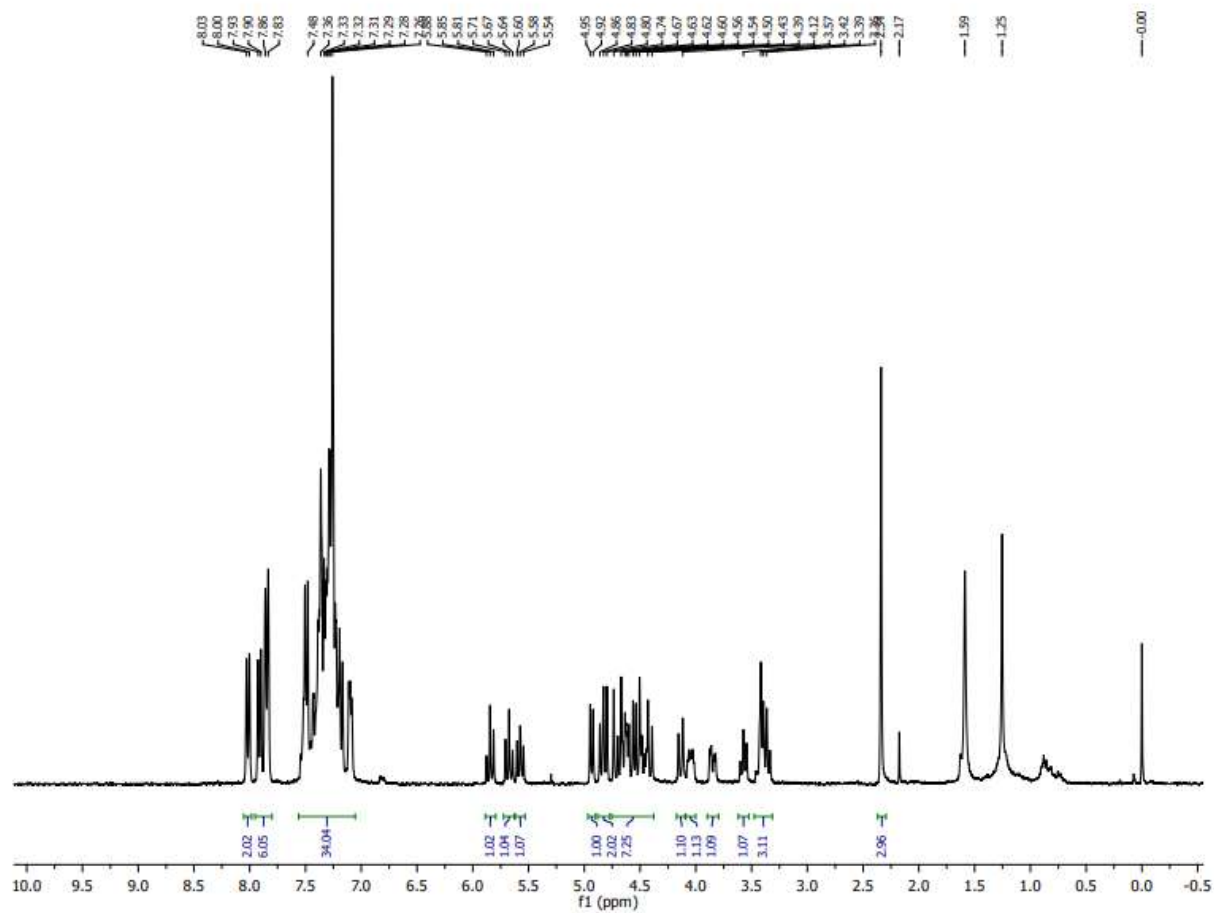

$^1\text{H NMR}$  (300 MHz,  $\text{CDCl}_3$ )

# Cholesteryl 2,3,4,6-tetra-*O*-benzoyl- $\beta$ -D-glucopyranoside (23)

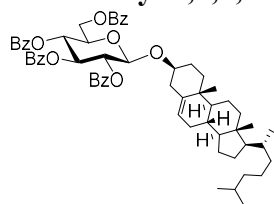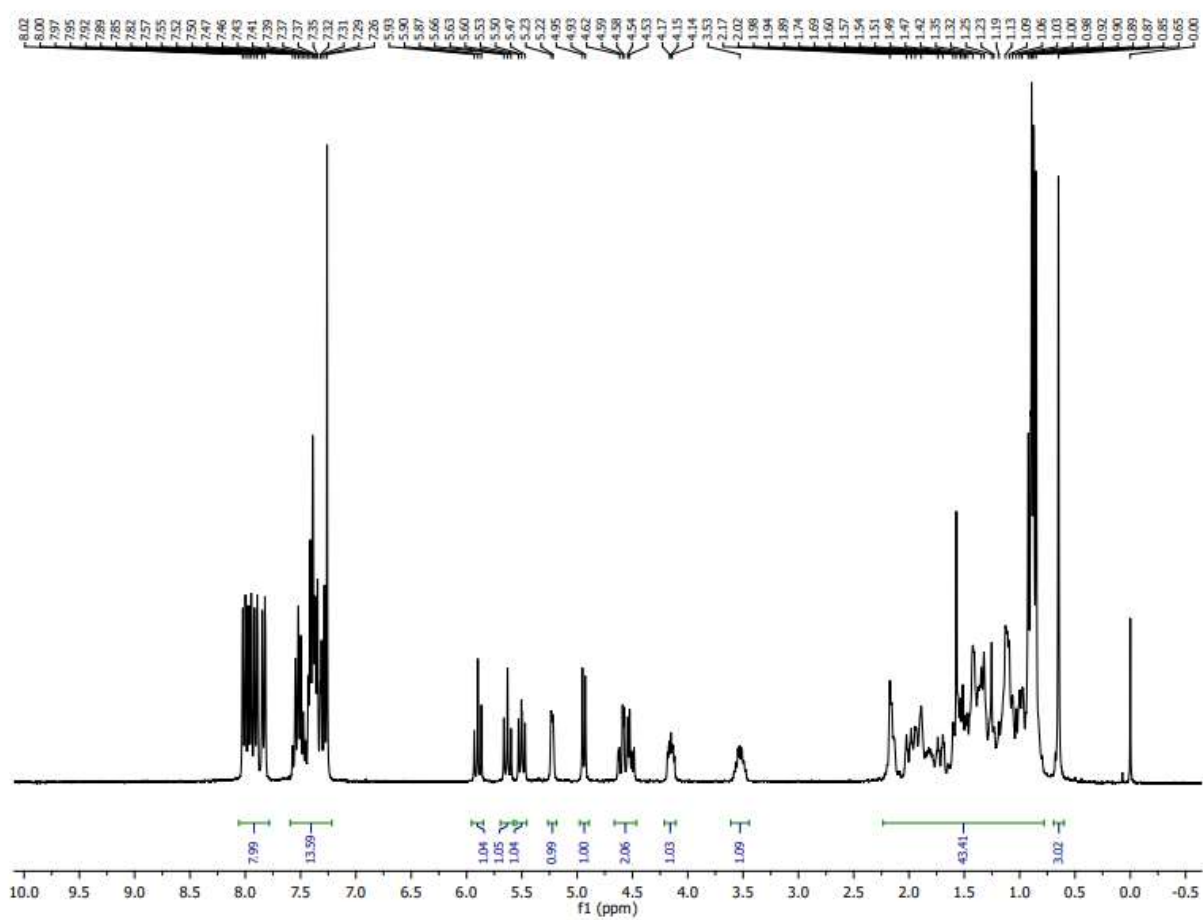

$^1\text{H}$  NMR (300 MHz,  $\text{CDCl}_3$ )

# 1-Adamantyl 2,3,4,6-tetra-*O*-benzoyl- $\beta$ -D-glucopyranoside (24)

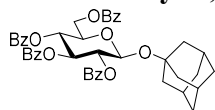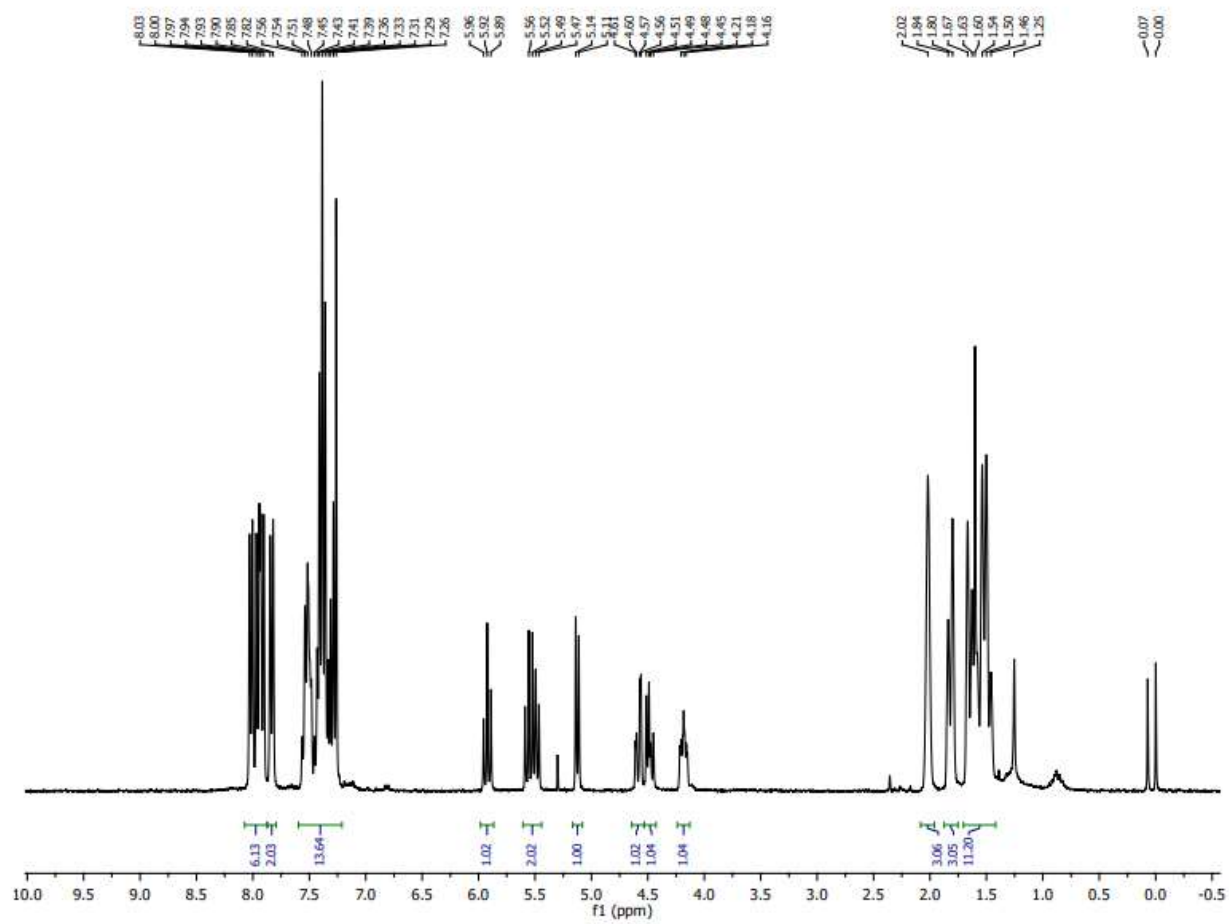

$^1\text{H}$  NMR (300 MHz,  $\text{CDCl}_3$ )

**Methyl 6-*O*-(2,3,4,6-tetra-*O*-benzoyl- $\beta$ -D-galactopyranosyl)-2,3,4-tri-*O*-benzyl- $\alpha$ -D-glucopyranoside (37)**

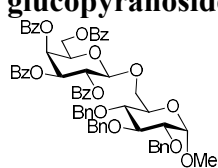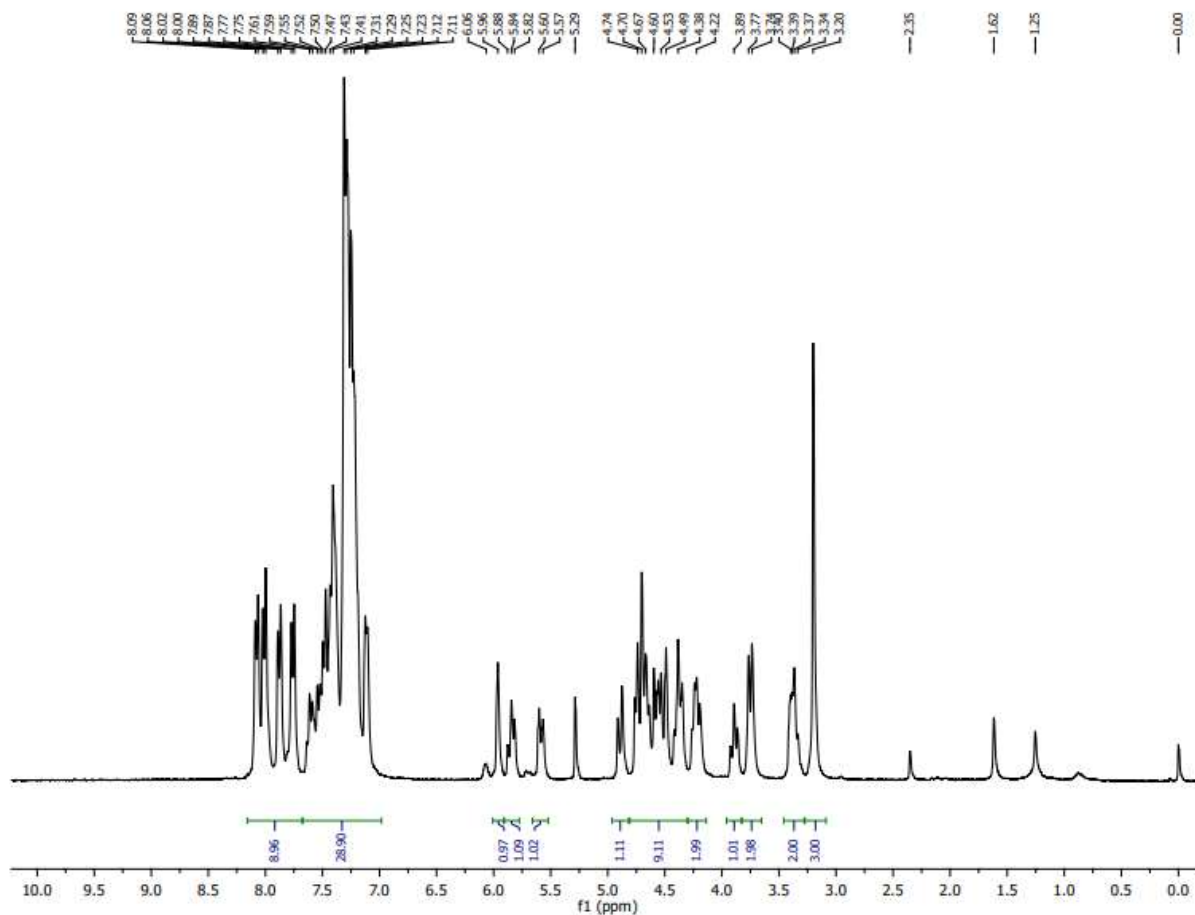

$^1\text{H NMR}$  (300 MHz,  $\text{CDCl}_3$ )

**Methyl 6-O-(2,3,4,6-tetra-O-benzoyl- $\alpha$ -D-mannopyranosyl)-2,3,4-tri-O-benzyl- $\alpha$ -D-glucopyranoside (38)**

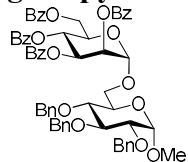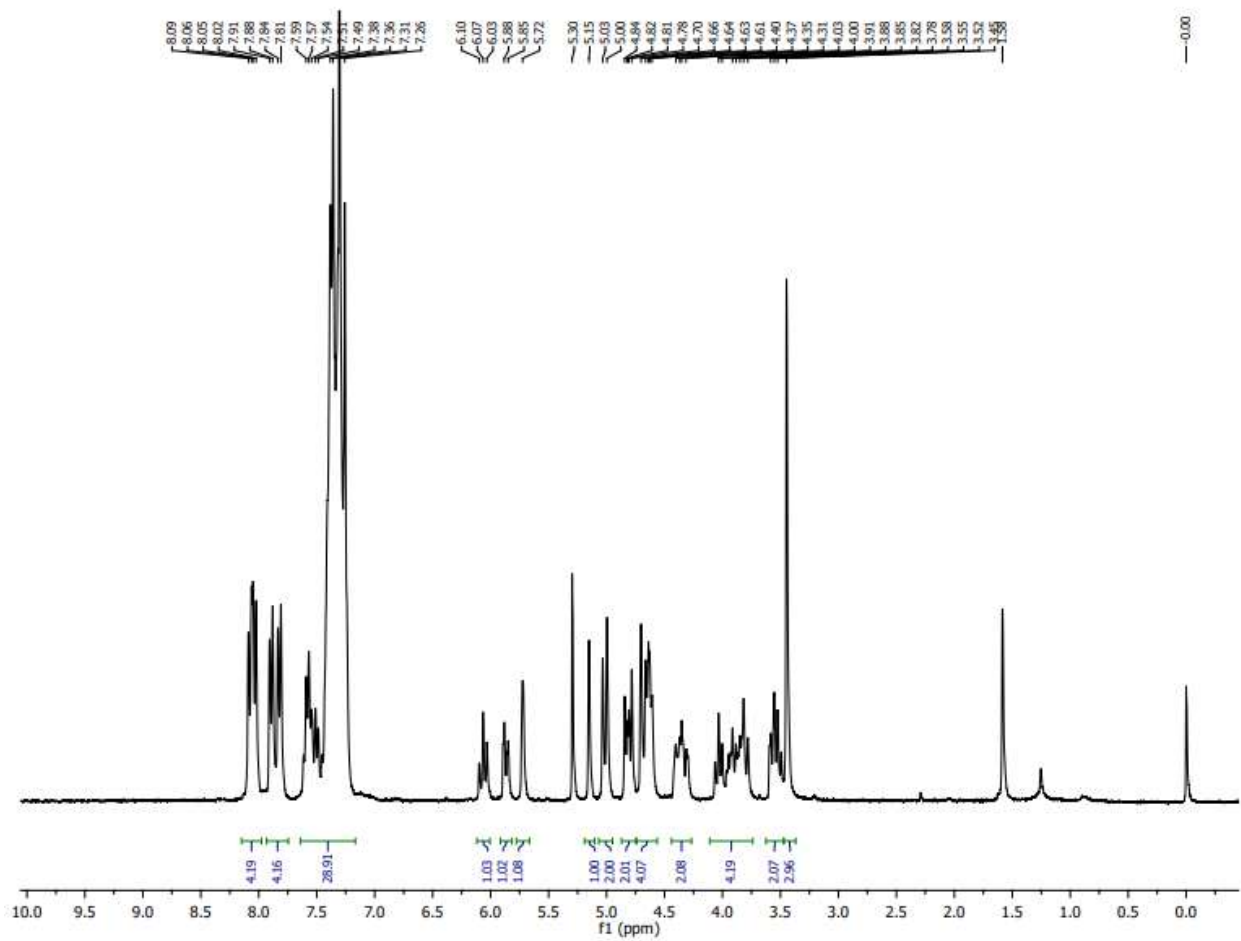

$^1\text{H}$  NMR (300 MHz,  $\text{CDCl}_3$ )

**Methyl 6-O-(2,3,4,6-tetra-O-benzyl-D-glucopyranosyl)-2,3,4-tri-O-benzyl- $\alpha$ -D-glucopyranoside (39) ( $\alpha/\beta = 1/1.5$ )**

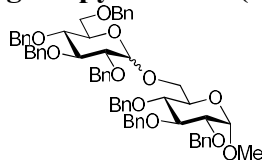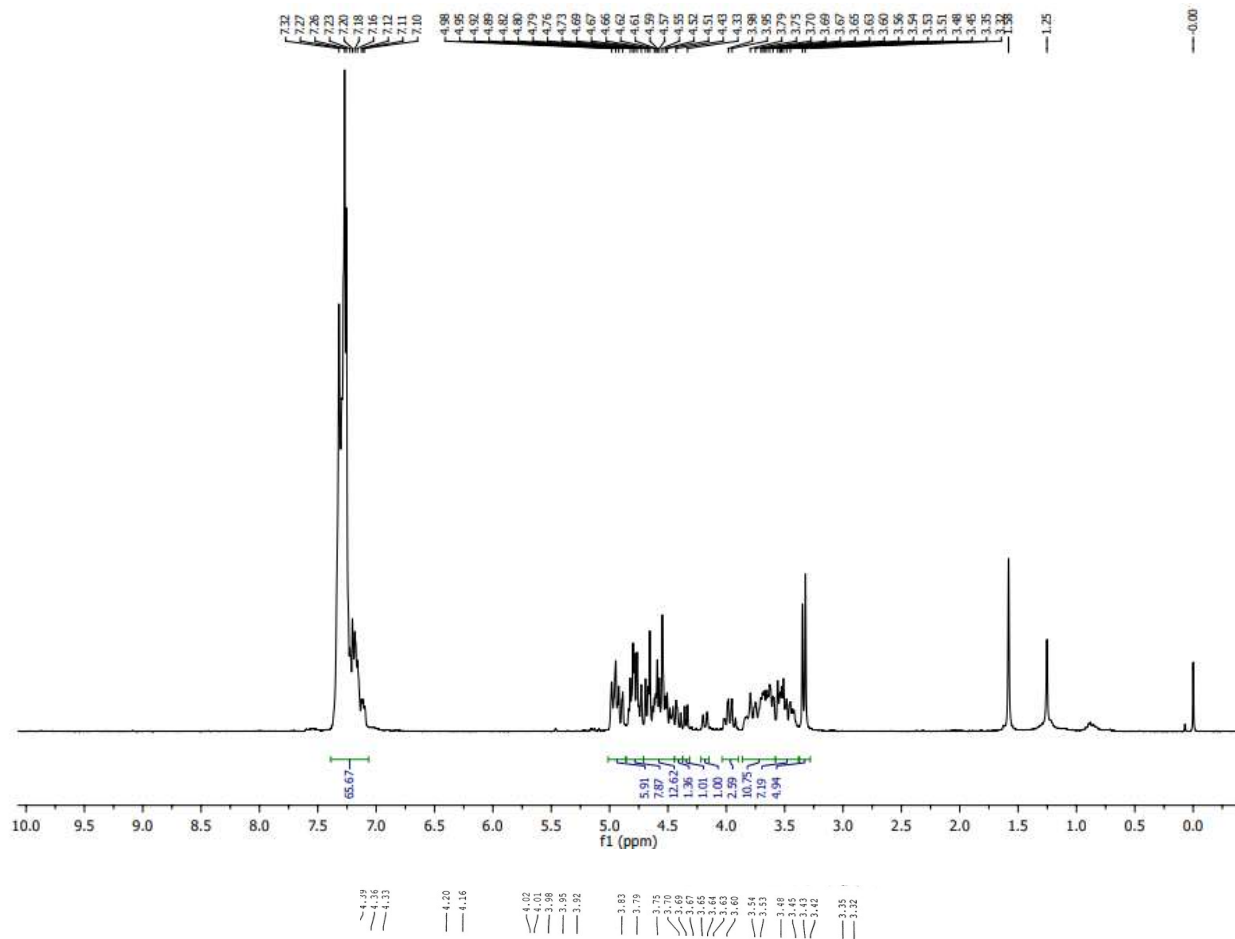

$\alpha/\beta$  ratio = 1/1.5

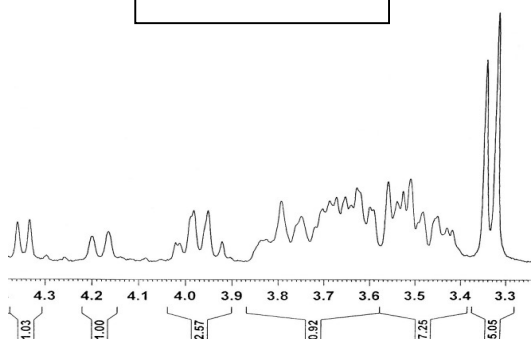

$^1\text{H NMR}$  (300 MHz,  $\text{CDCl}_3$ )

**Methyl 6-*O*-(2,3,4,6-tetra-*O*-benzyl-D-galactopyranosyl)-2,3,4-tri-*O*-benzyl- $\alpha$ -D-glucopyranoside (40) ( $\alpha/\beta = 1/1.1$ )**

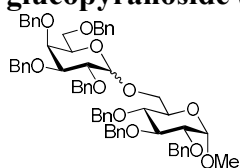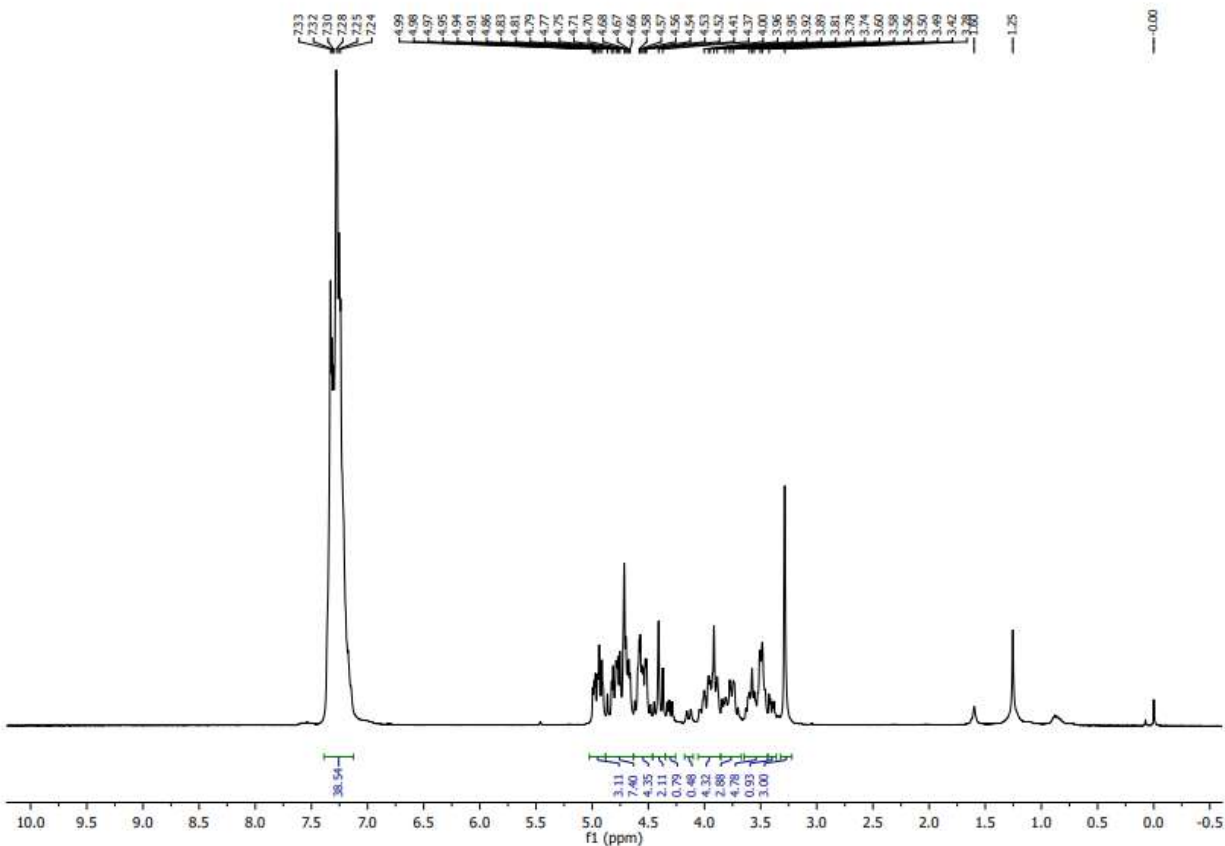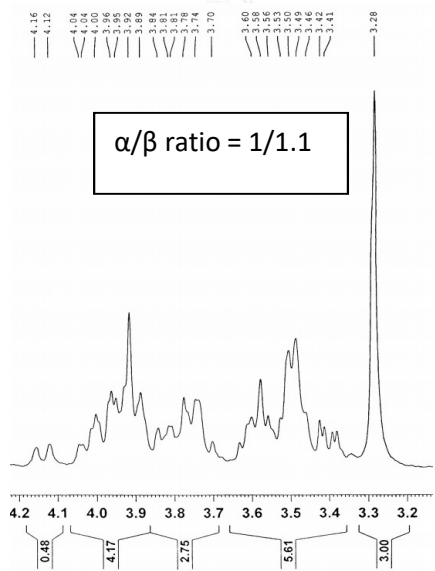

$^1\text{H NMR}$  (300 MHz,  $\text{CDCl}_3$ )

**Methyl 6-O-(2,3,4,6-tetra-O-benzyl-D-mannopyranosyl)-2,3,4-tri-O-benzyl- $\alpha$ -D-glucopyranoside (41) ( $\alpha/\beta = 1/1.4$ )**

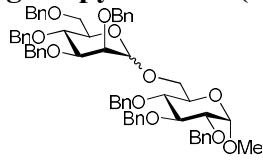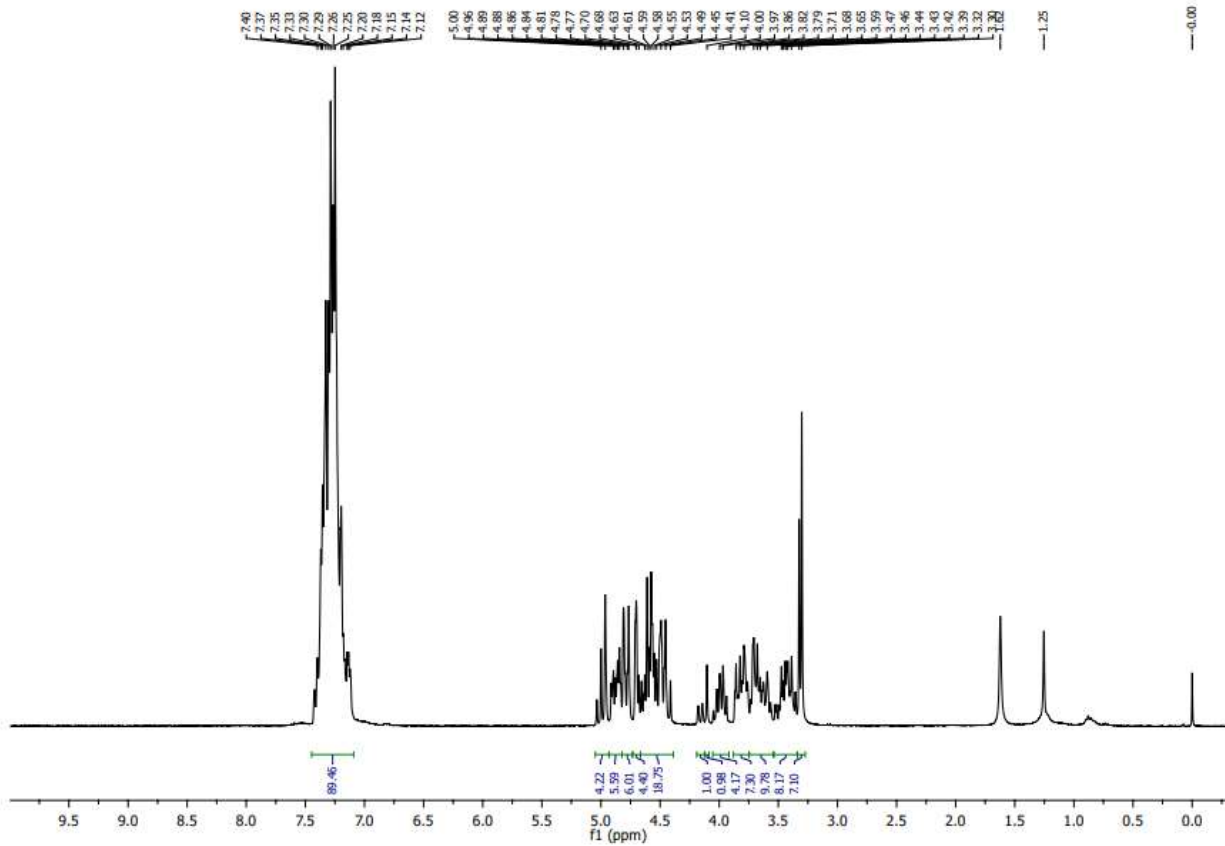

6.18  
6.14  
6.10  
6.05  
6.02  
6.00  
5.97  
5.94  
3.86  
3.84  
3.82  
3.80  
3.79  
3.76  
3.73  
3.71  
3.71  
3.68  
3.65  
3.63  
3.59  
3.57  
3.53  
3.51  
3.49  
3.47  
3.46  
3.43  
3.42  
3.39  
3.36  
3.32  
3.30

$\alpha/\beta$  ratio = 1/1.4

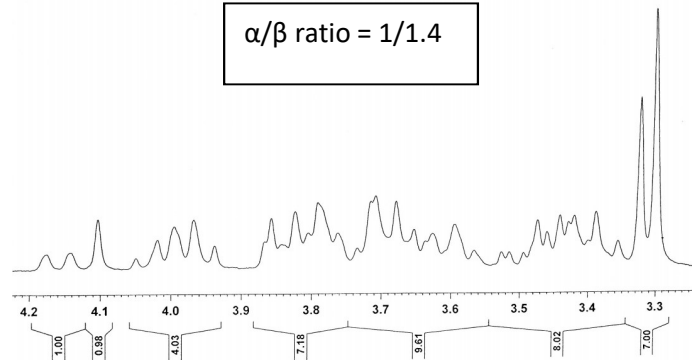

$^1\text{H NMR}$  (300 MHz,  $\text{CDCl}_3$ )



**Methyl 6-*O*-(2,3,4-tri-*O*-benzoyl- $\alpha$ -L-rhamnopyranosyl)-2,3,4-tri-*O*-benzyl- $\alpha$ -D-glucopyranoside (45)**

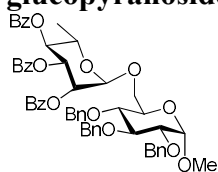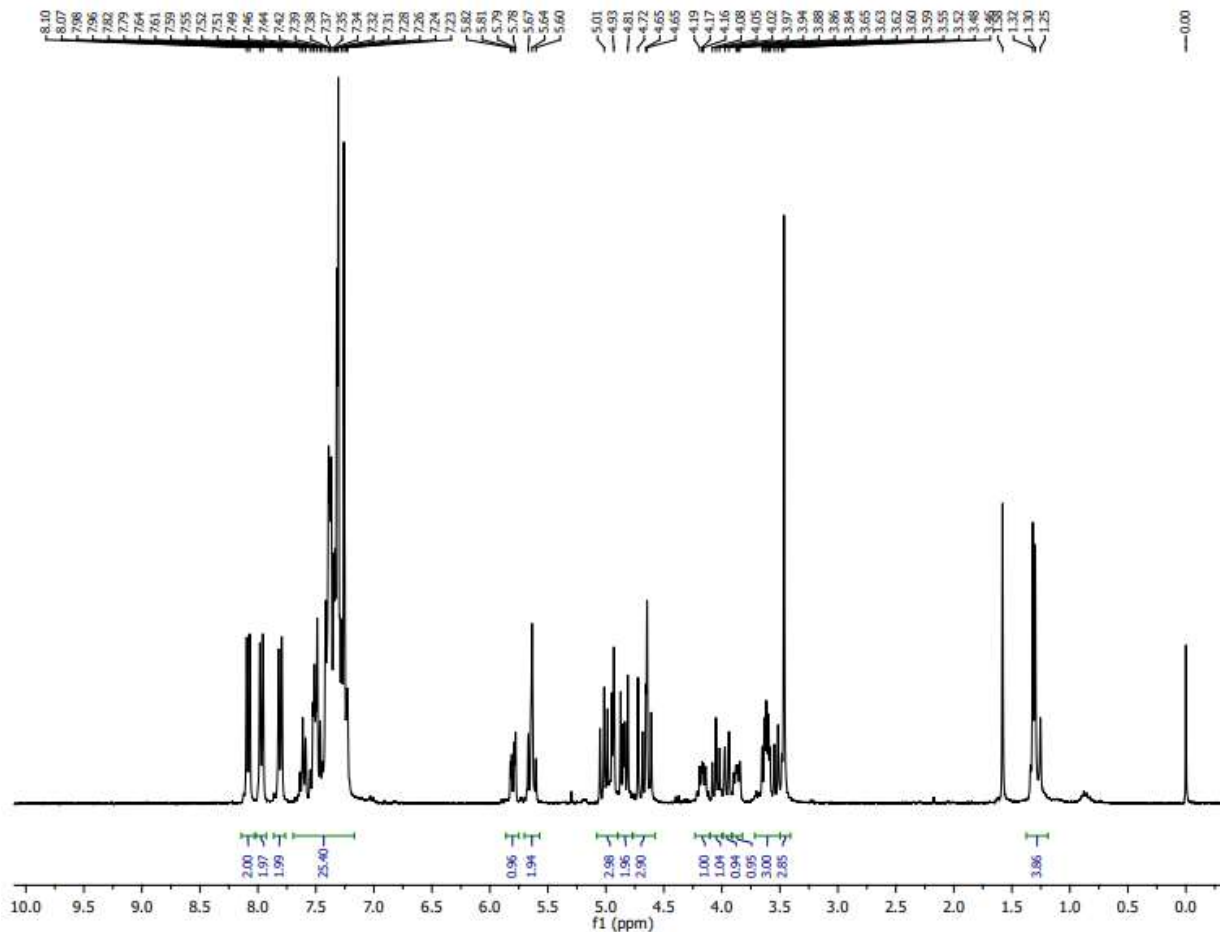

$^1\text{H}$  NMR (300 MHz,  $\text{CDCl}_3$ )
